# Supplementary material for: Synthesis of cyclic ethers by cyclodehydration of 1,n-diols using heteropoly acids as catalysts
Source: R Soc Open Sci. 2018 Sep 26;5(9):180740. doi: 10.1098/rsos.180740 (PMC6170547; doi:10.1098/rsos.180740)

**Synthesis of cyclic ethers by cyclodehydration of 1, n-diols using heteropoly acids as catalysts**

Yufeng Sun, Yatao Huang, Minmin Li, Jia Lu, Nuo Jin, Bei Fan*

Institute of Food Science and Technology, Chinese Academy of Agricultural Sciences / Key Laboratory of Agro-products Quality and Safety Control in Storage and Transport Process, Ministry of Agricultrue, P.R. China

* E-mail: [fanbei517@163.com](mailto:fanbei517@163.com) (B. Fan). Fax: +86-10-62815969.

| **TABLE OF CONTENTS** | **PAGE** |
| --- | --- |
| 1. 1H NMR spectra of product 3a | S1 |
| 2. 13C NMR spectra of product 3a | S1 |
| 3. MS spectra of product 3a | S2 |
| 4. 1H NMR spectra of product 3b | S2 |
| 5. 13C NMR spectra of product 3b | S3 |
| 6. MS spectra of product 3b | S3 |
| 7. 1H NMR spectra of product 3c | S4 |
| 8. 13C NMR spectra of product 3c | S4 |
| 9. MS spectra of product 3c | S5 |
| 10. 1H NMR spectra of product 3d | S5 |
| 11. 13C NMR spectra of product 3d | S6 |
| 12. MS spectra of product 3d | S6 |
| 13. 1H NMR spectra of product 3e | S7 |
| 14. 13C NMR spectra of product 3e | S7 |
| 15. MS spectra of product 3e | S8 |
| 16. 1H NMR spectra of product 3g | S8 |
| 17. 13C NMR spectra of product 3g | S9 |
| 18. MS spectra of product 3g | S9 |
| 19. GC spectra of product 3a | S10 |
| 20. GC spectra of product 3b | S10 |
| 21. GC spectra of product 3c | S11 |
| 22. GC spectra of product 3d | S11 |
| 23. GC spectra of product 3e | S12 |
| 24. GC spectra of product 3g | S12 |

1. 1H NMR spectra of product 3a


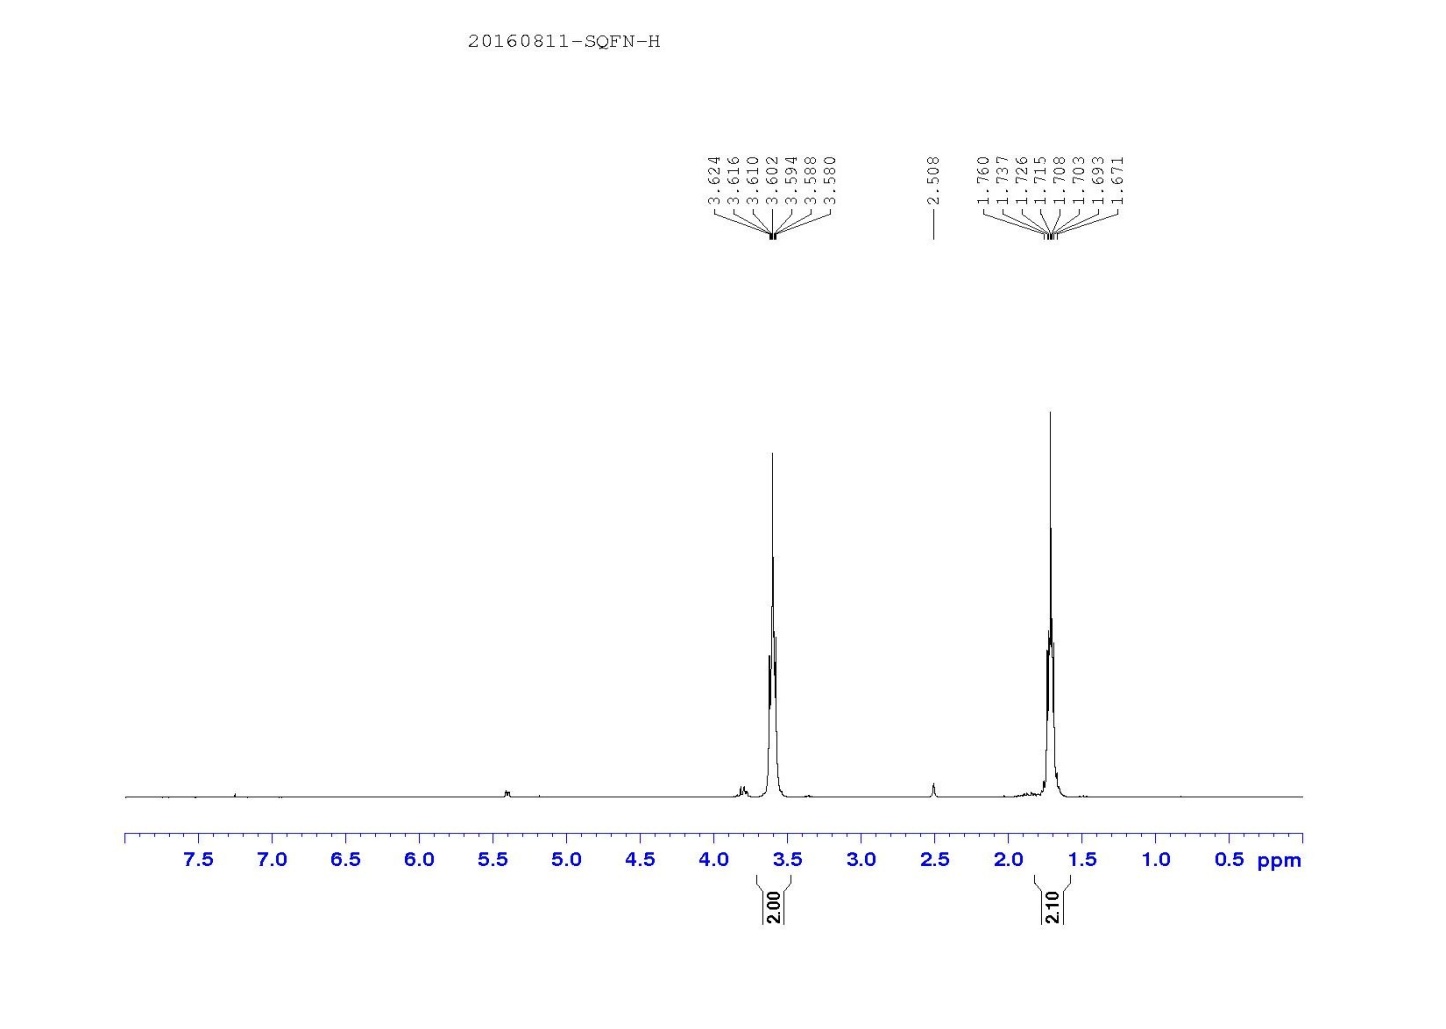


2. 13C NMR spectra of product 3a


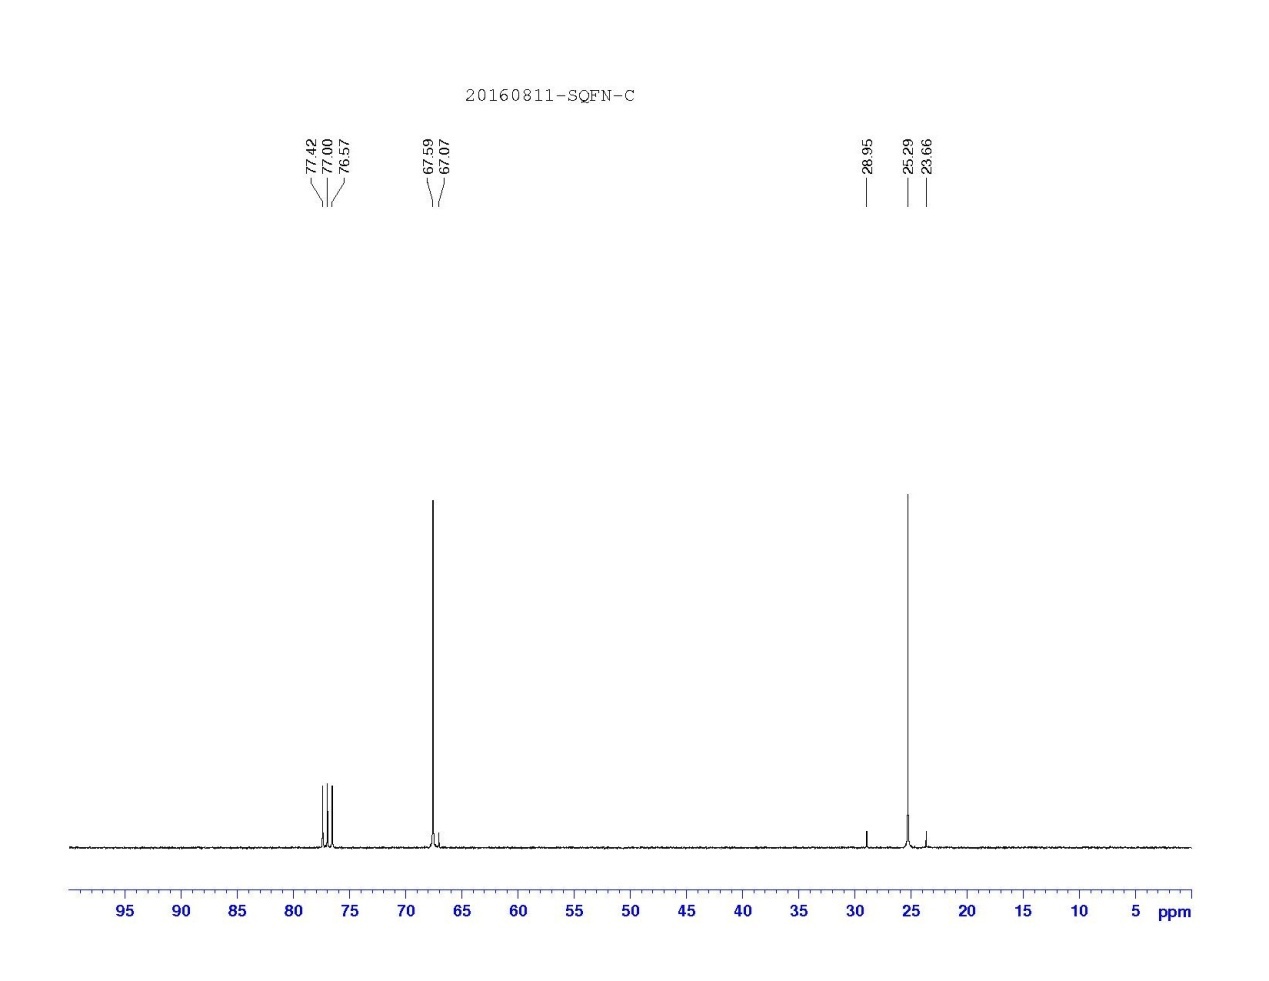


3. MS spectra of product 3a

4. 1H NMR spectra of product 3b


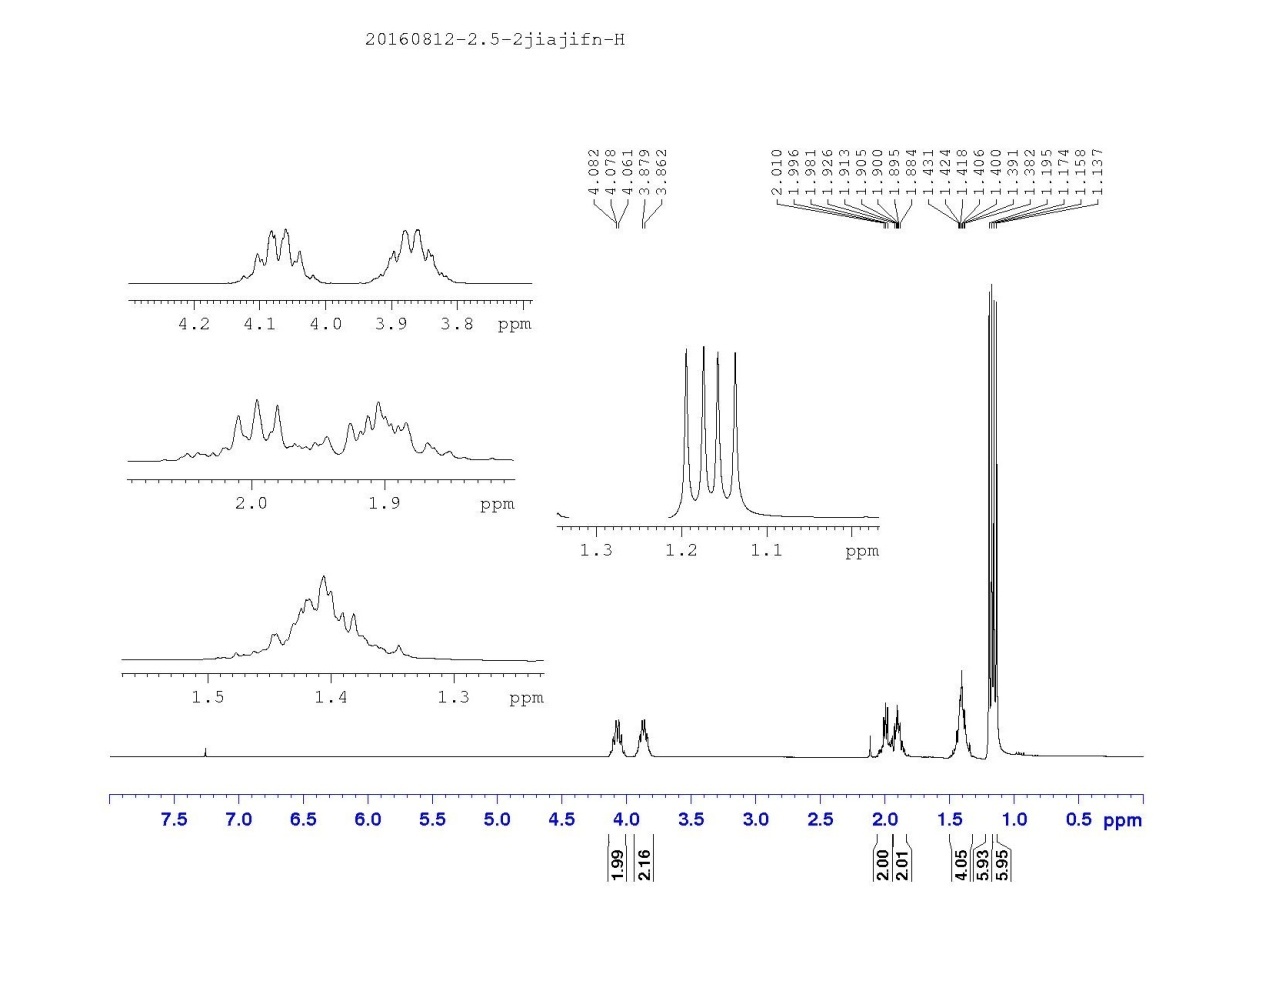


5. 13C NMR spectra of product 3b


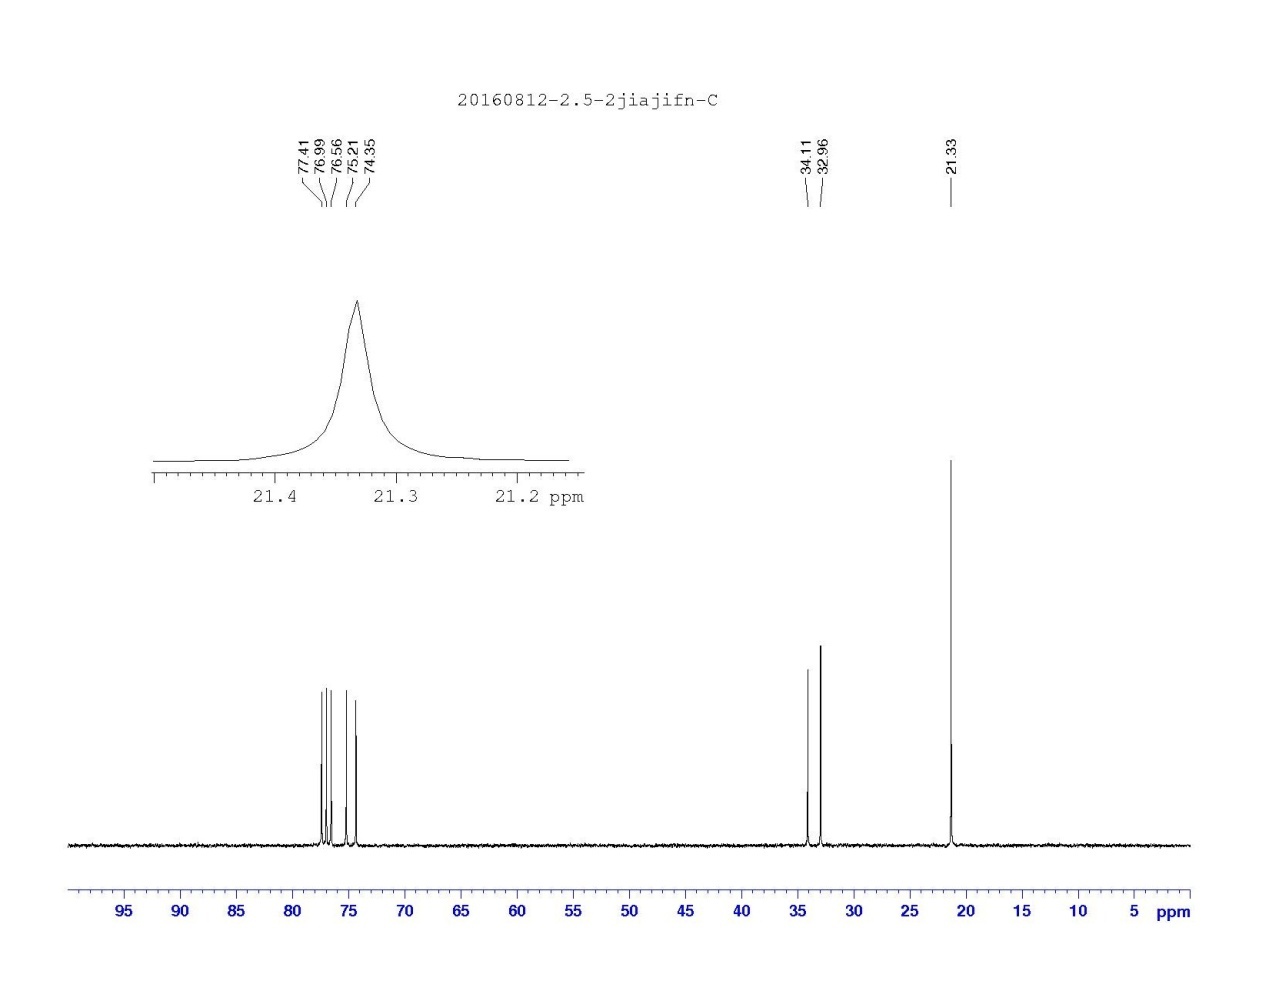


6. MS spectra of product 3b

7. 1H NMR spectra of product 3c


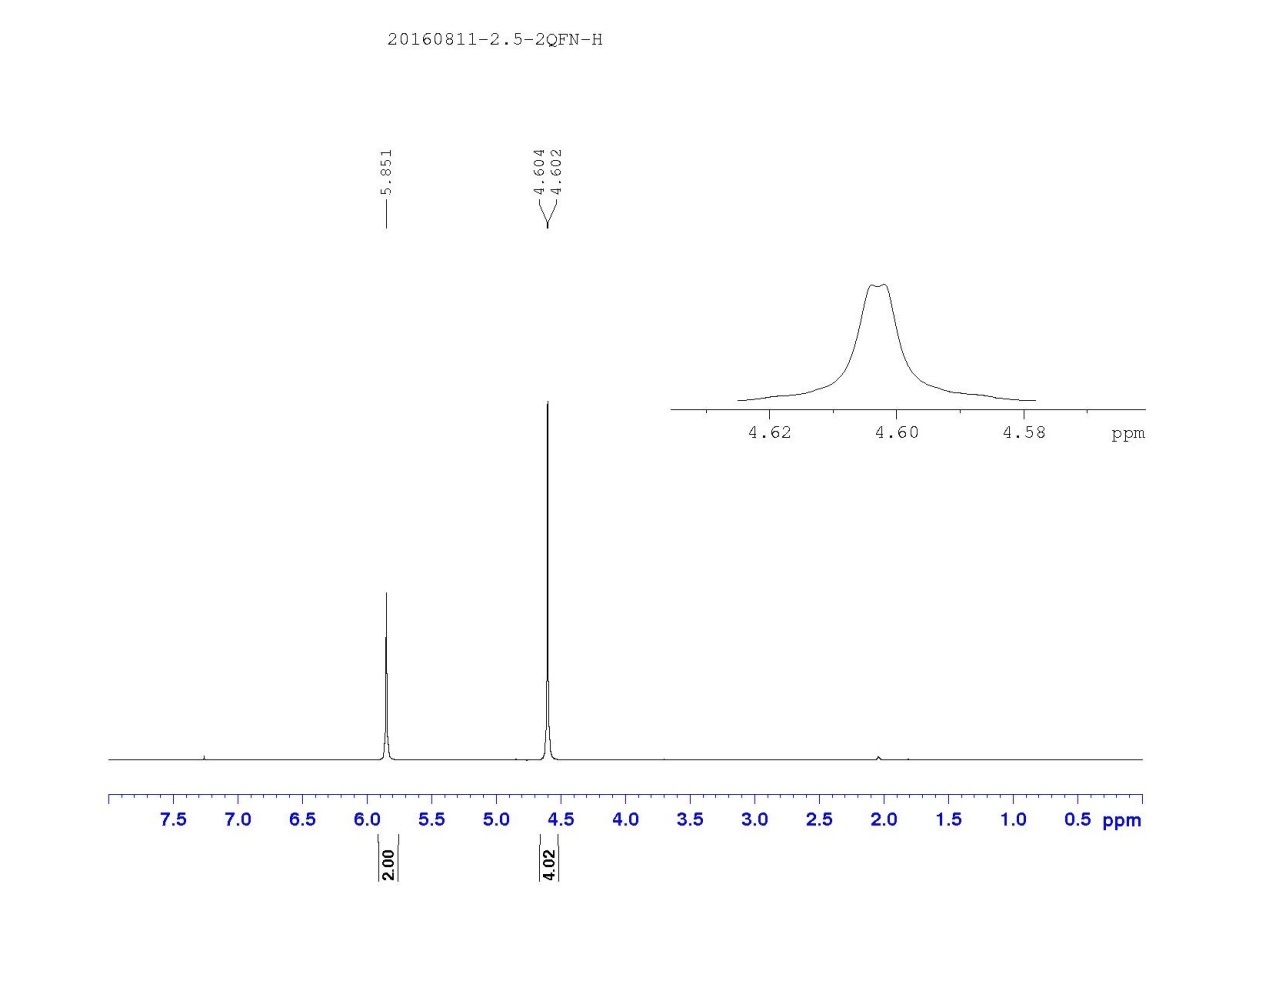


8. 13C NMR spectra of product 3c


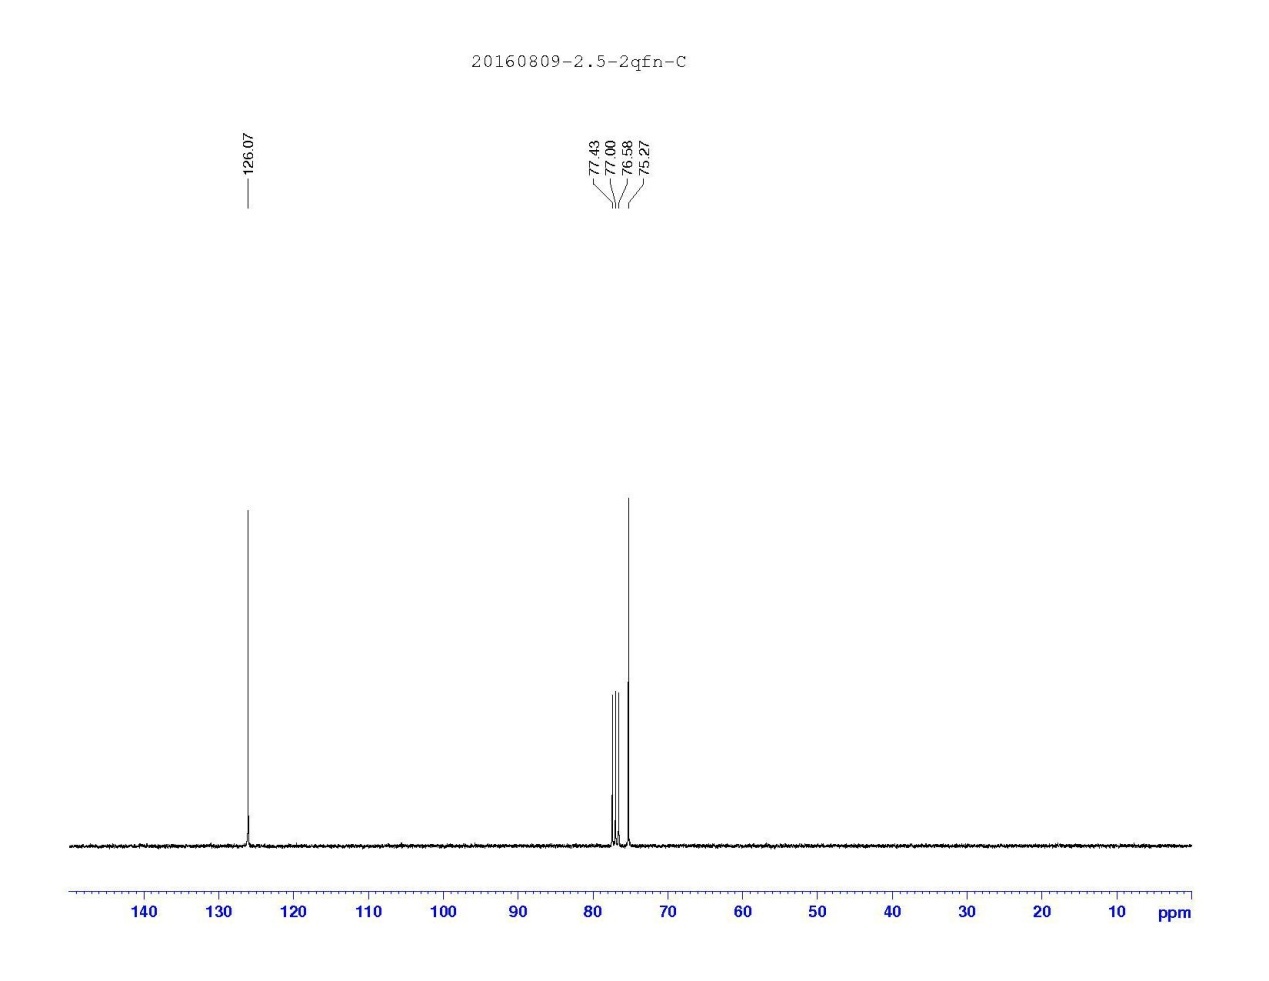


9. MS spectra of product 3c

10. 1H NMR spectra of product 3d


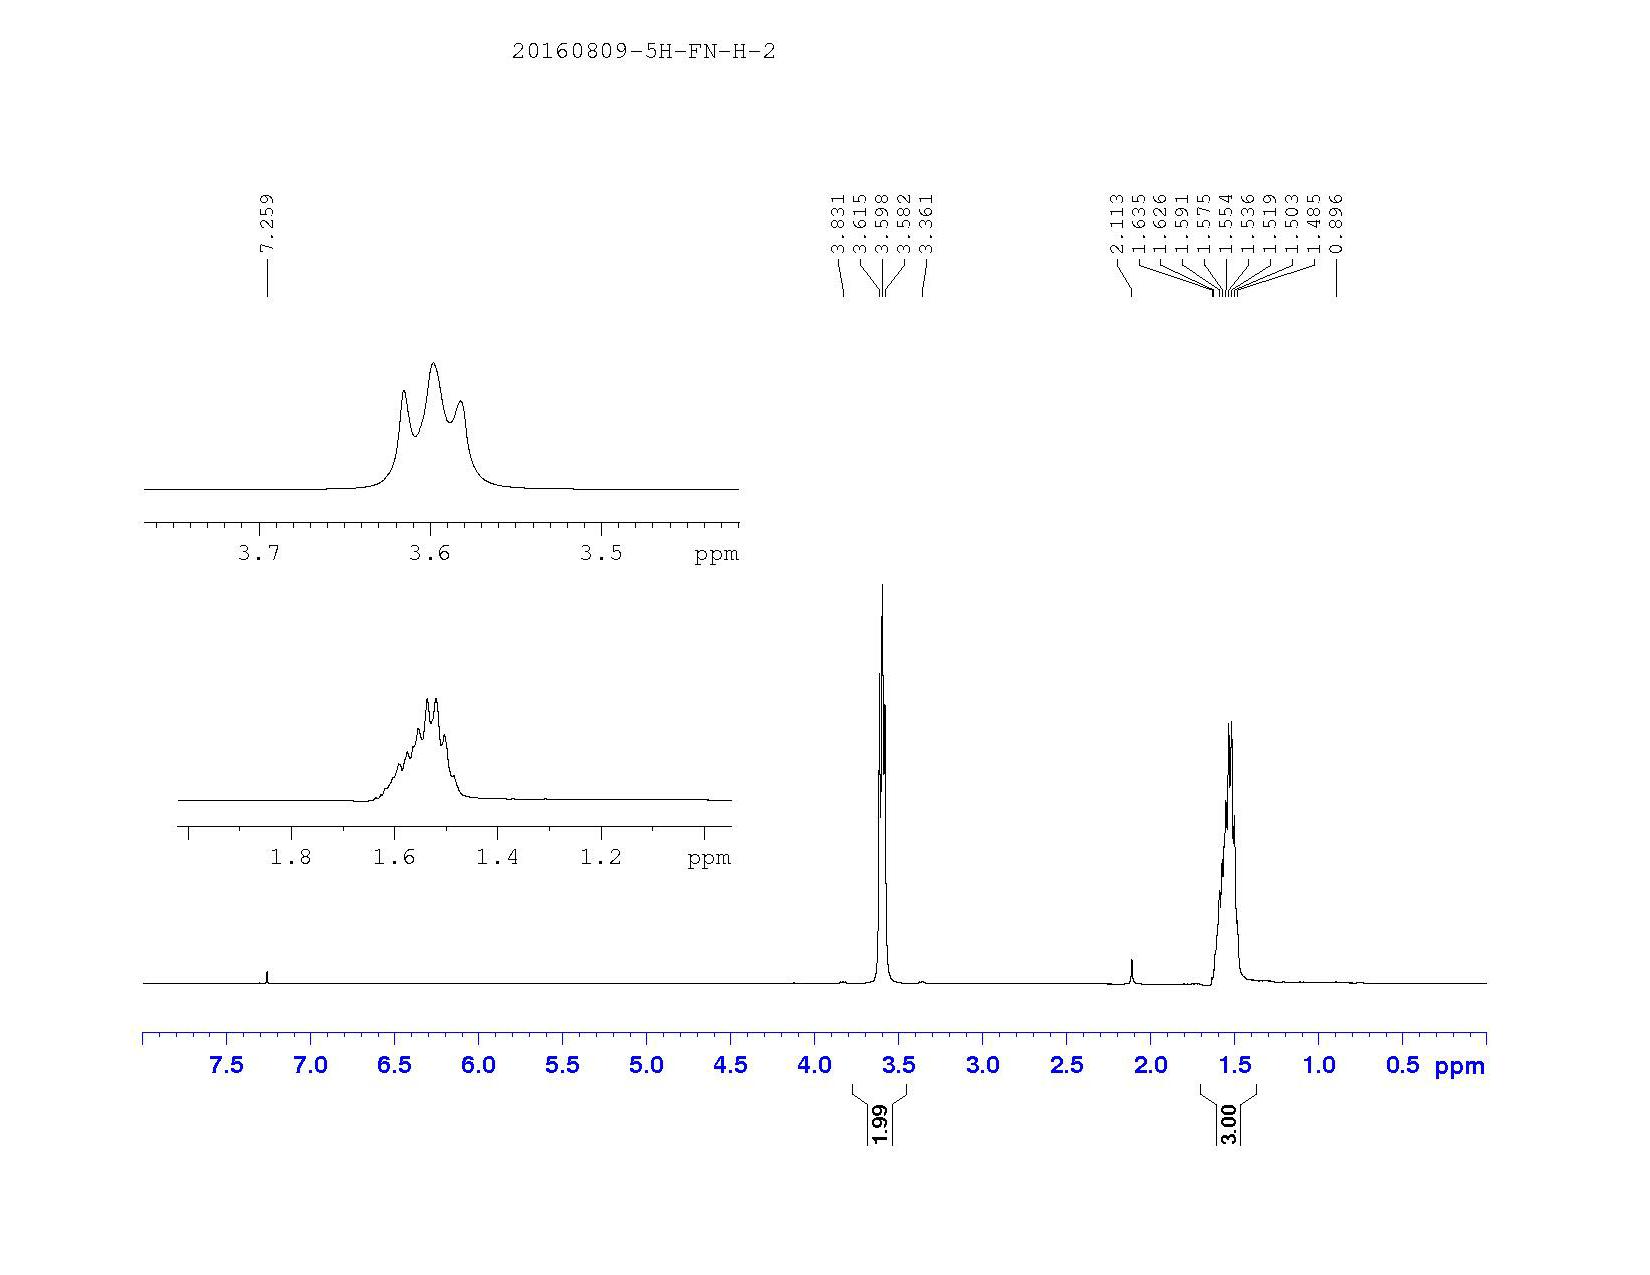


11. 13C NMR spectra of product 3d


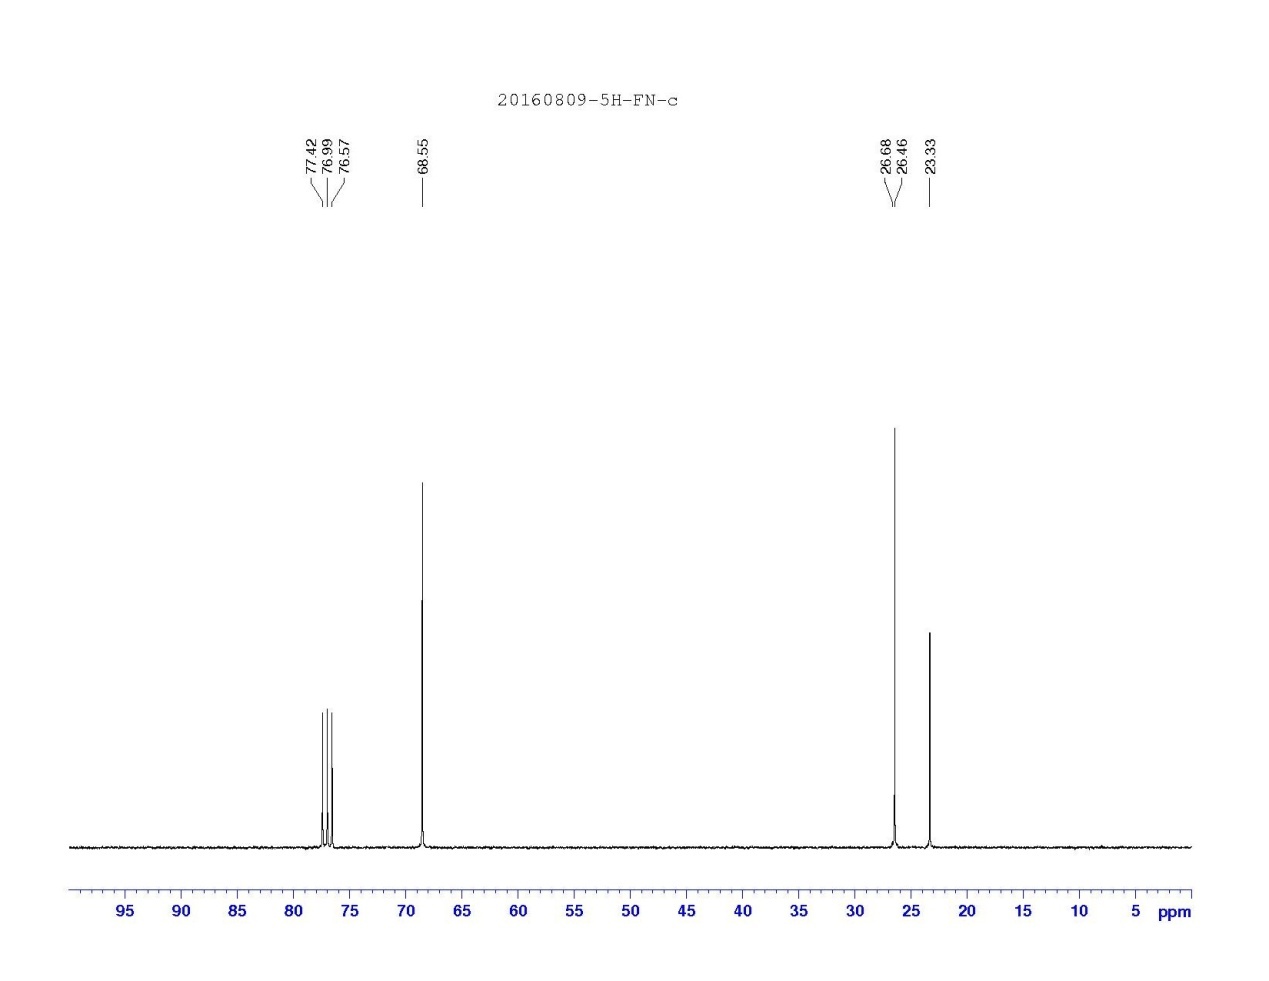


12. MS spectra of product 3d

13. 1H NMR spectra of product 3e


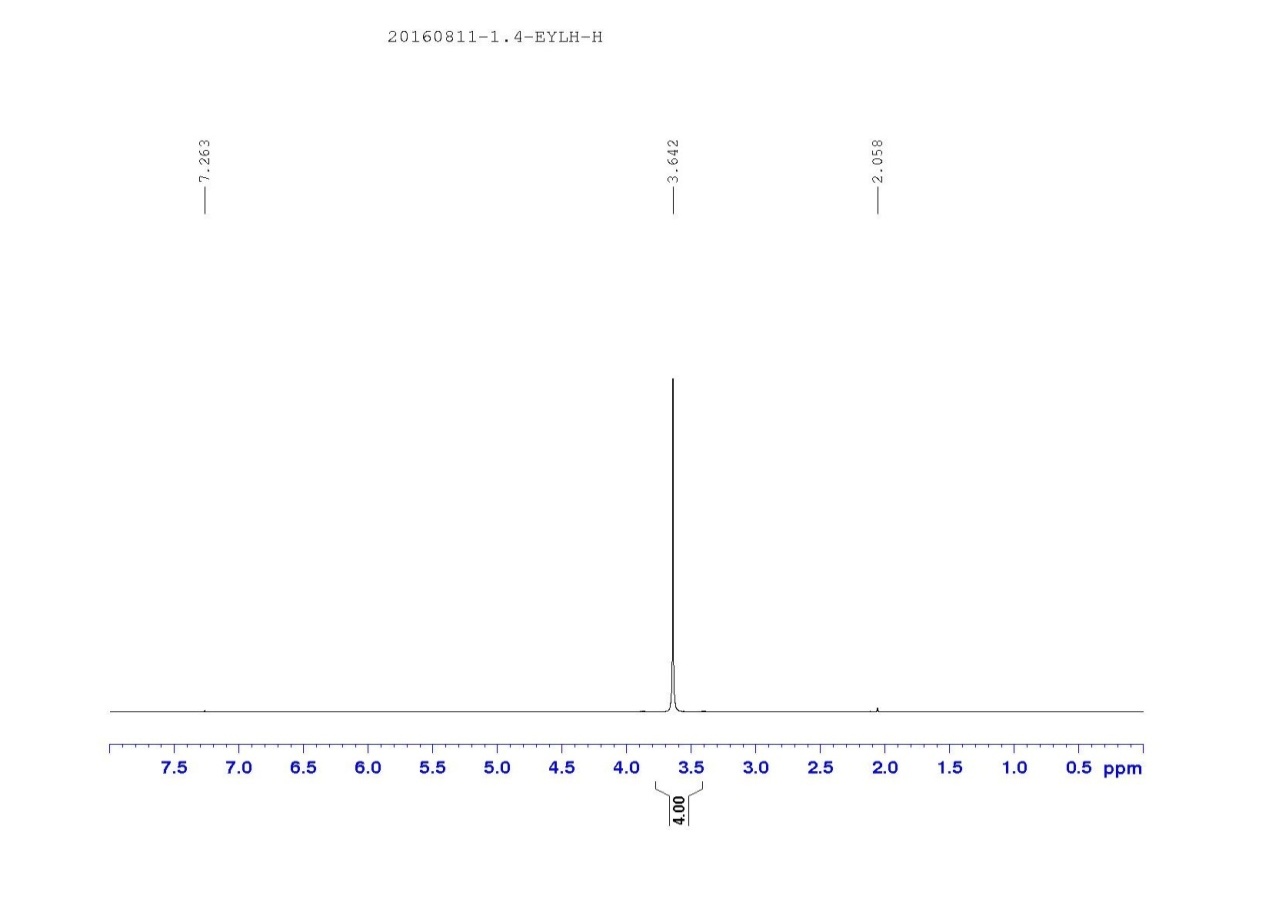


14. 13C NMR spectra of product 3e


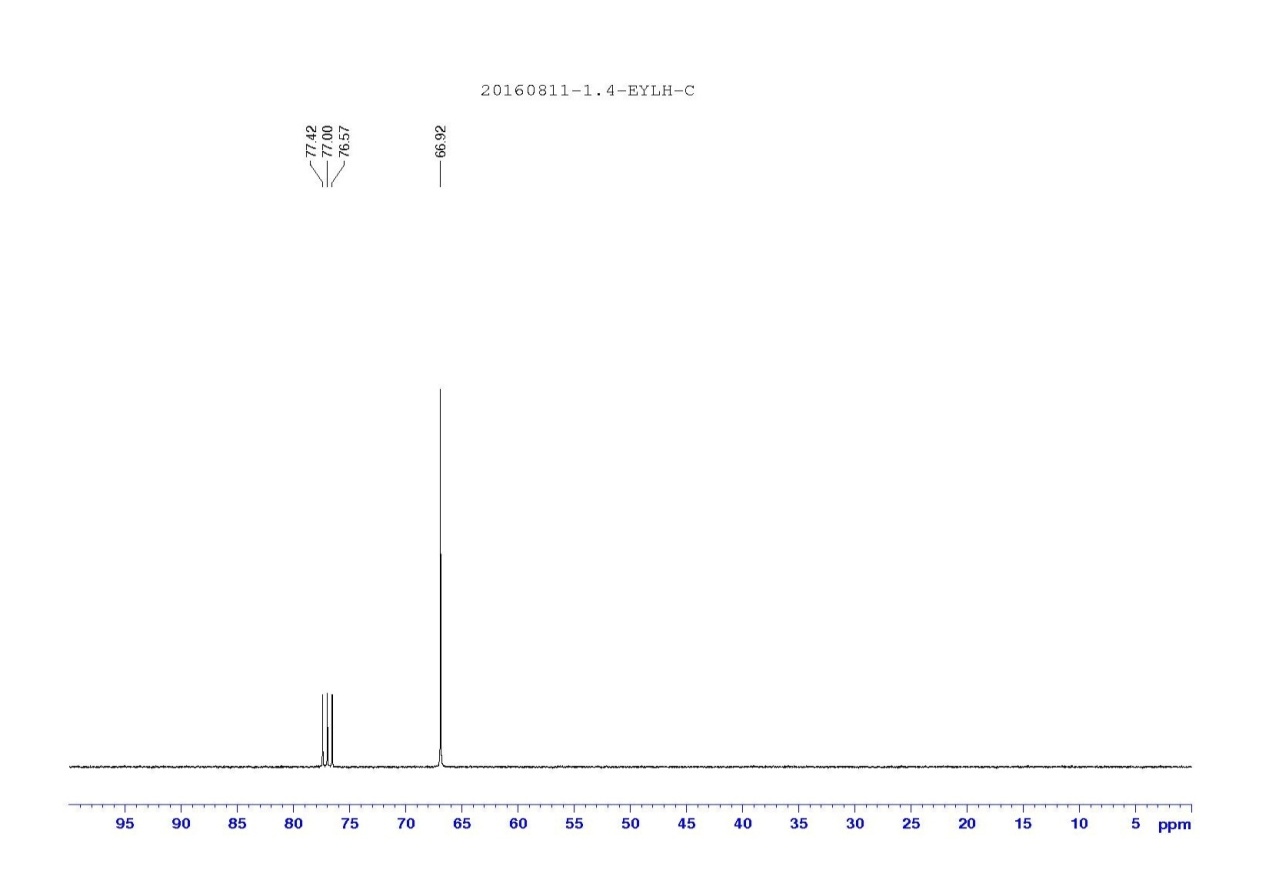


15. MS spectra of product 3e

16. 1H NMR spectra of product 3g


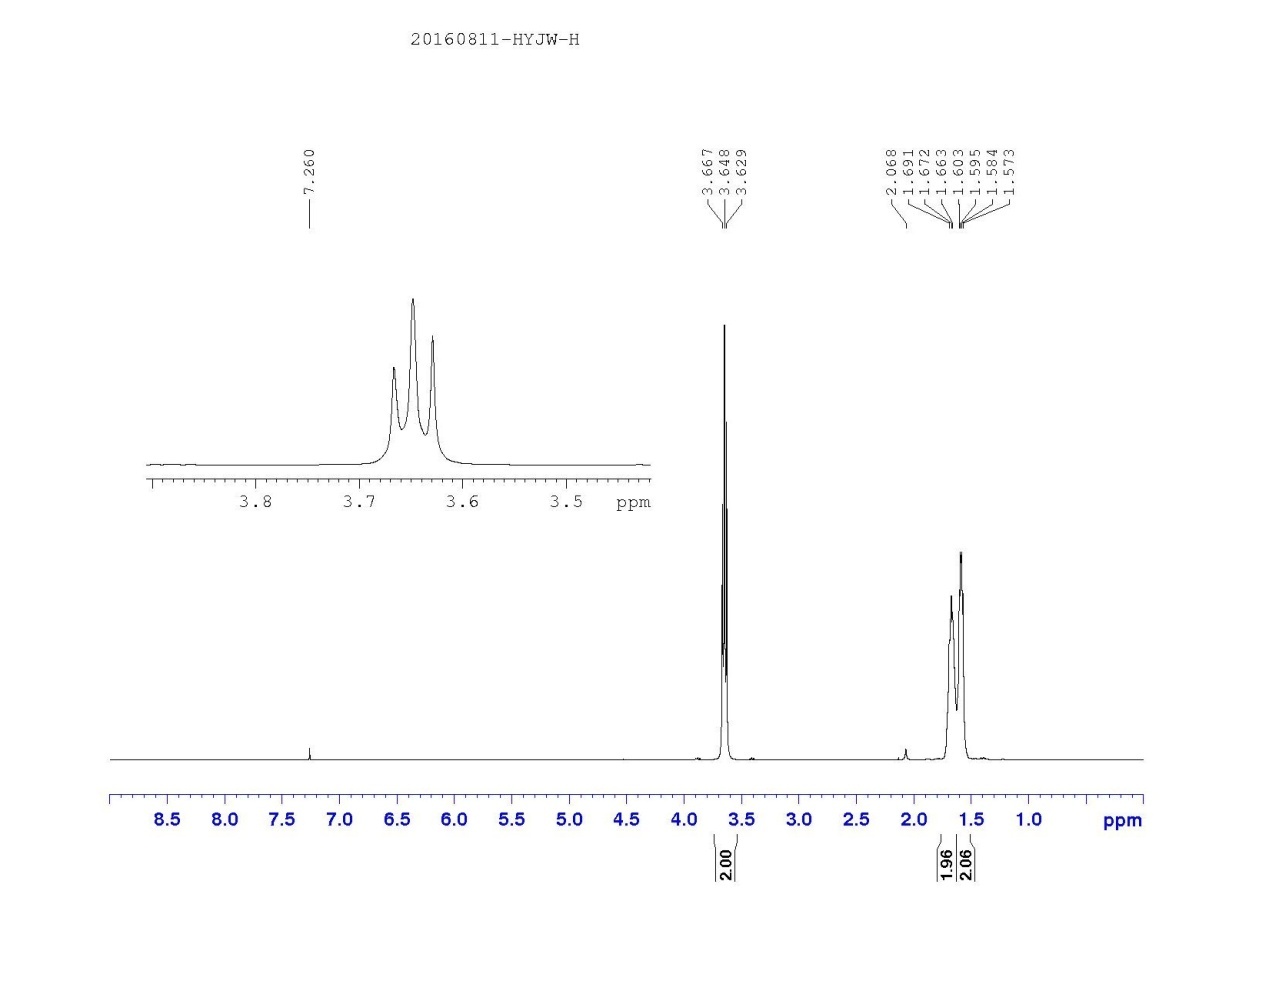


17. 13C NMR spectra of product 3g


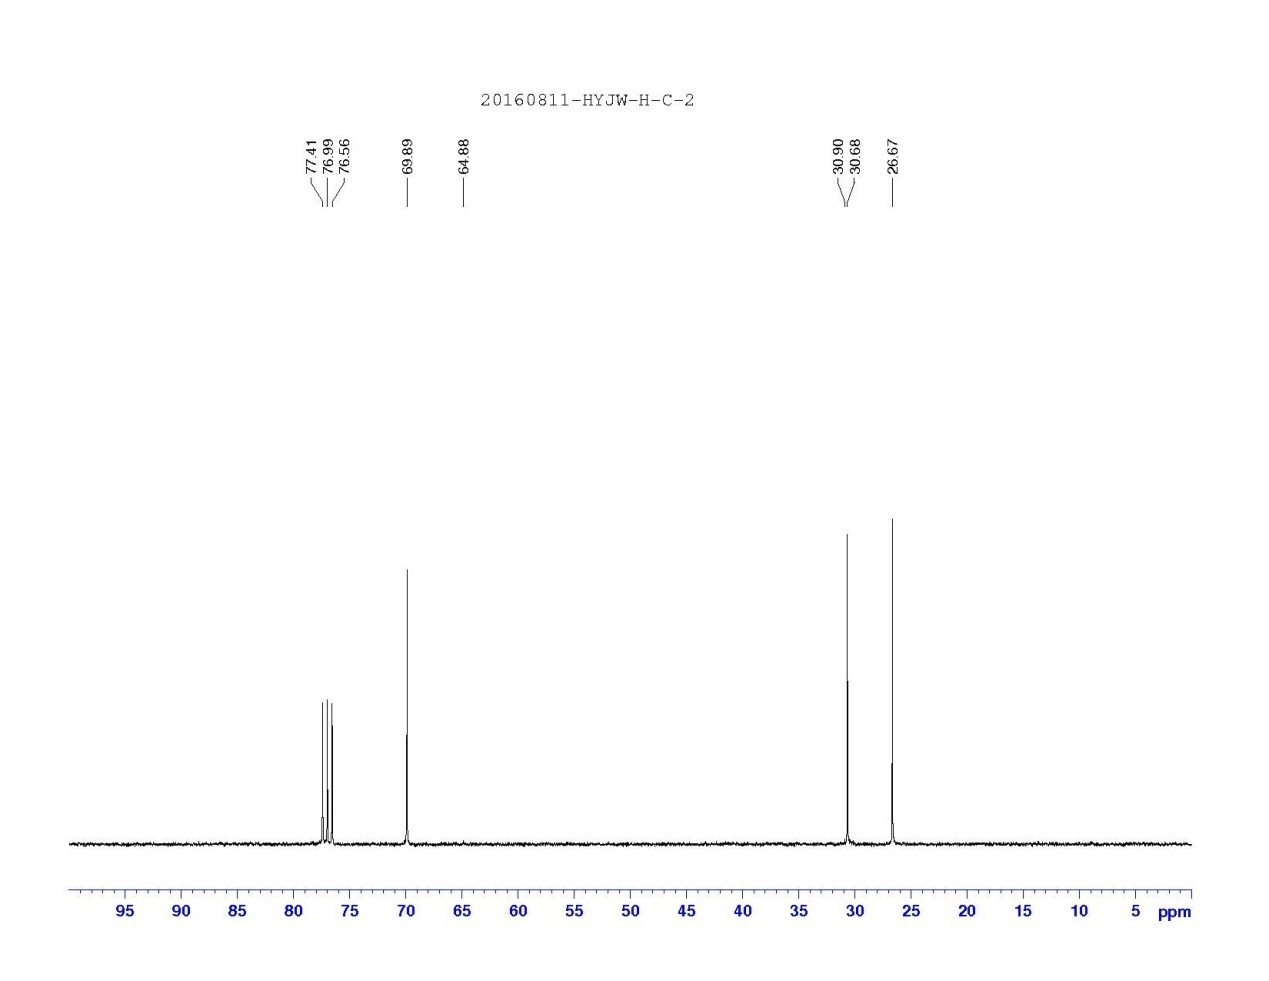


18. MS spectra of product 3g

19. GC spectra of product 3a


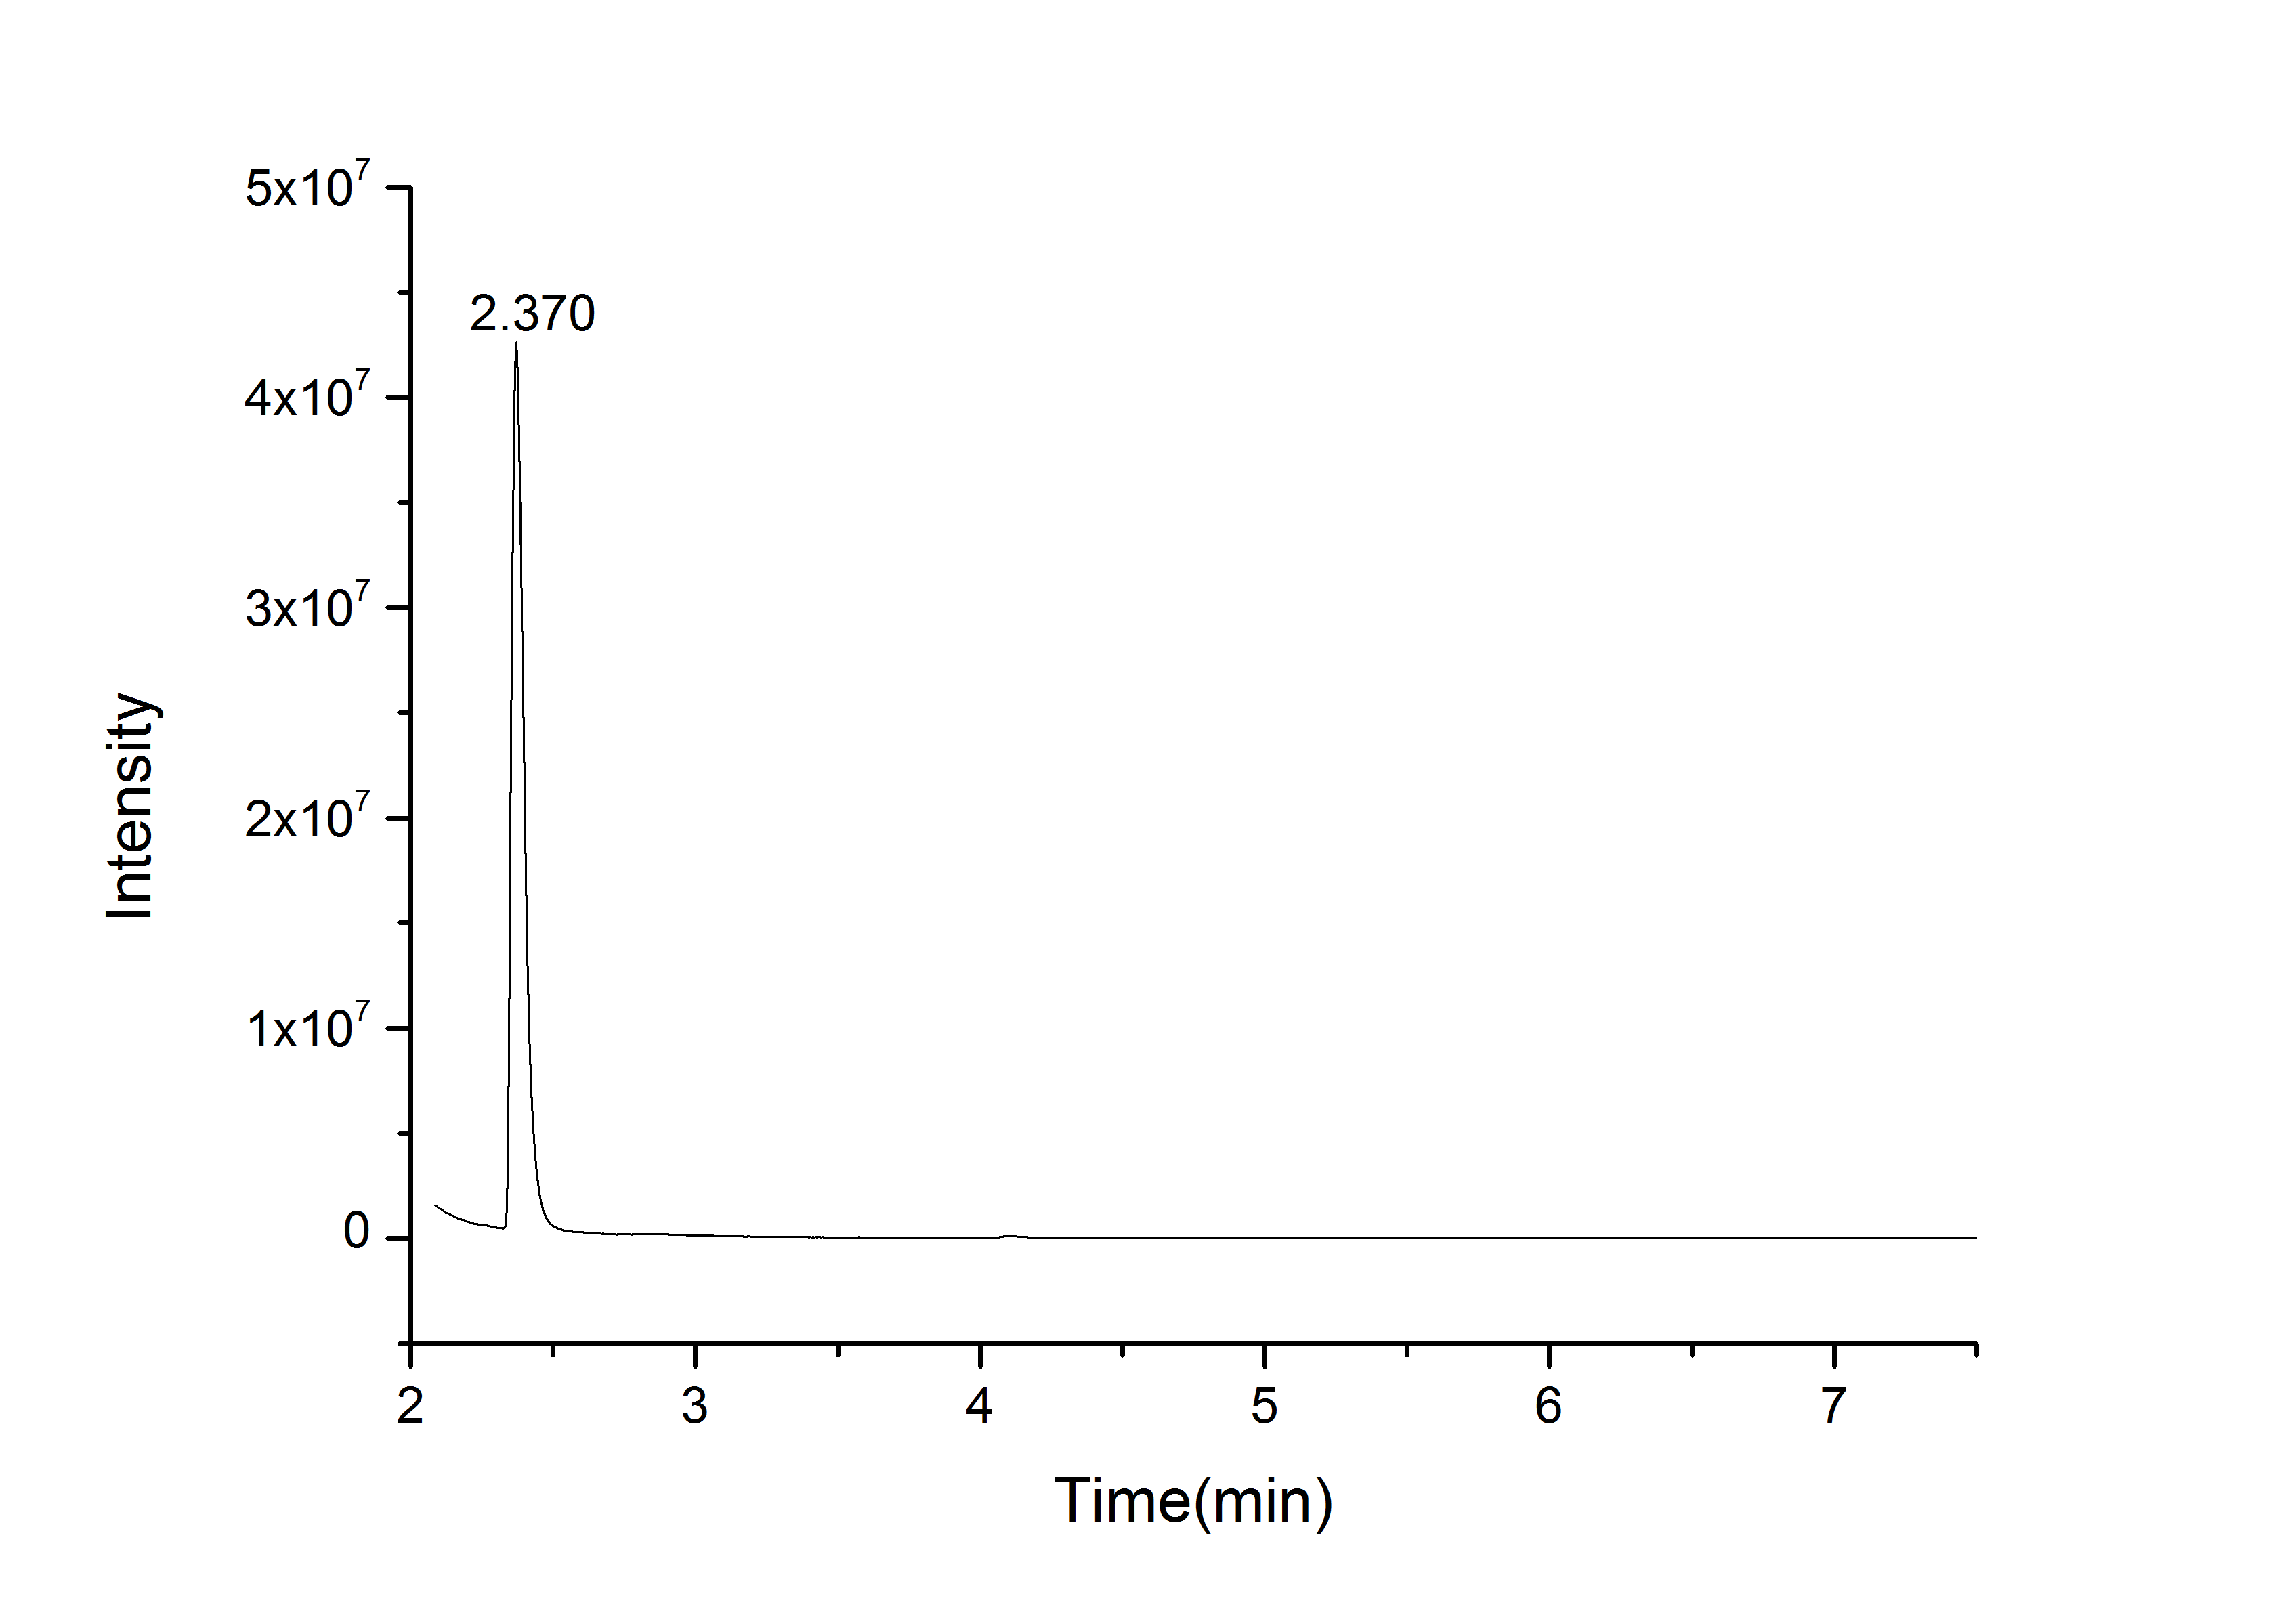


20. GC spectra of product 3b (cis-trans isomerism)


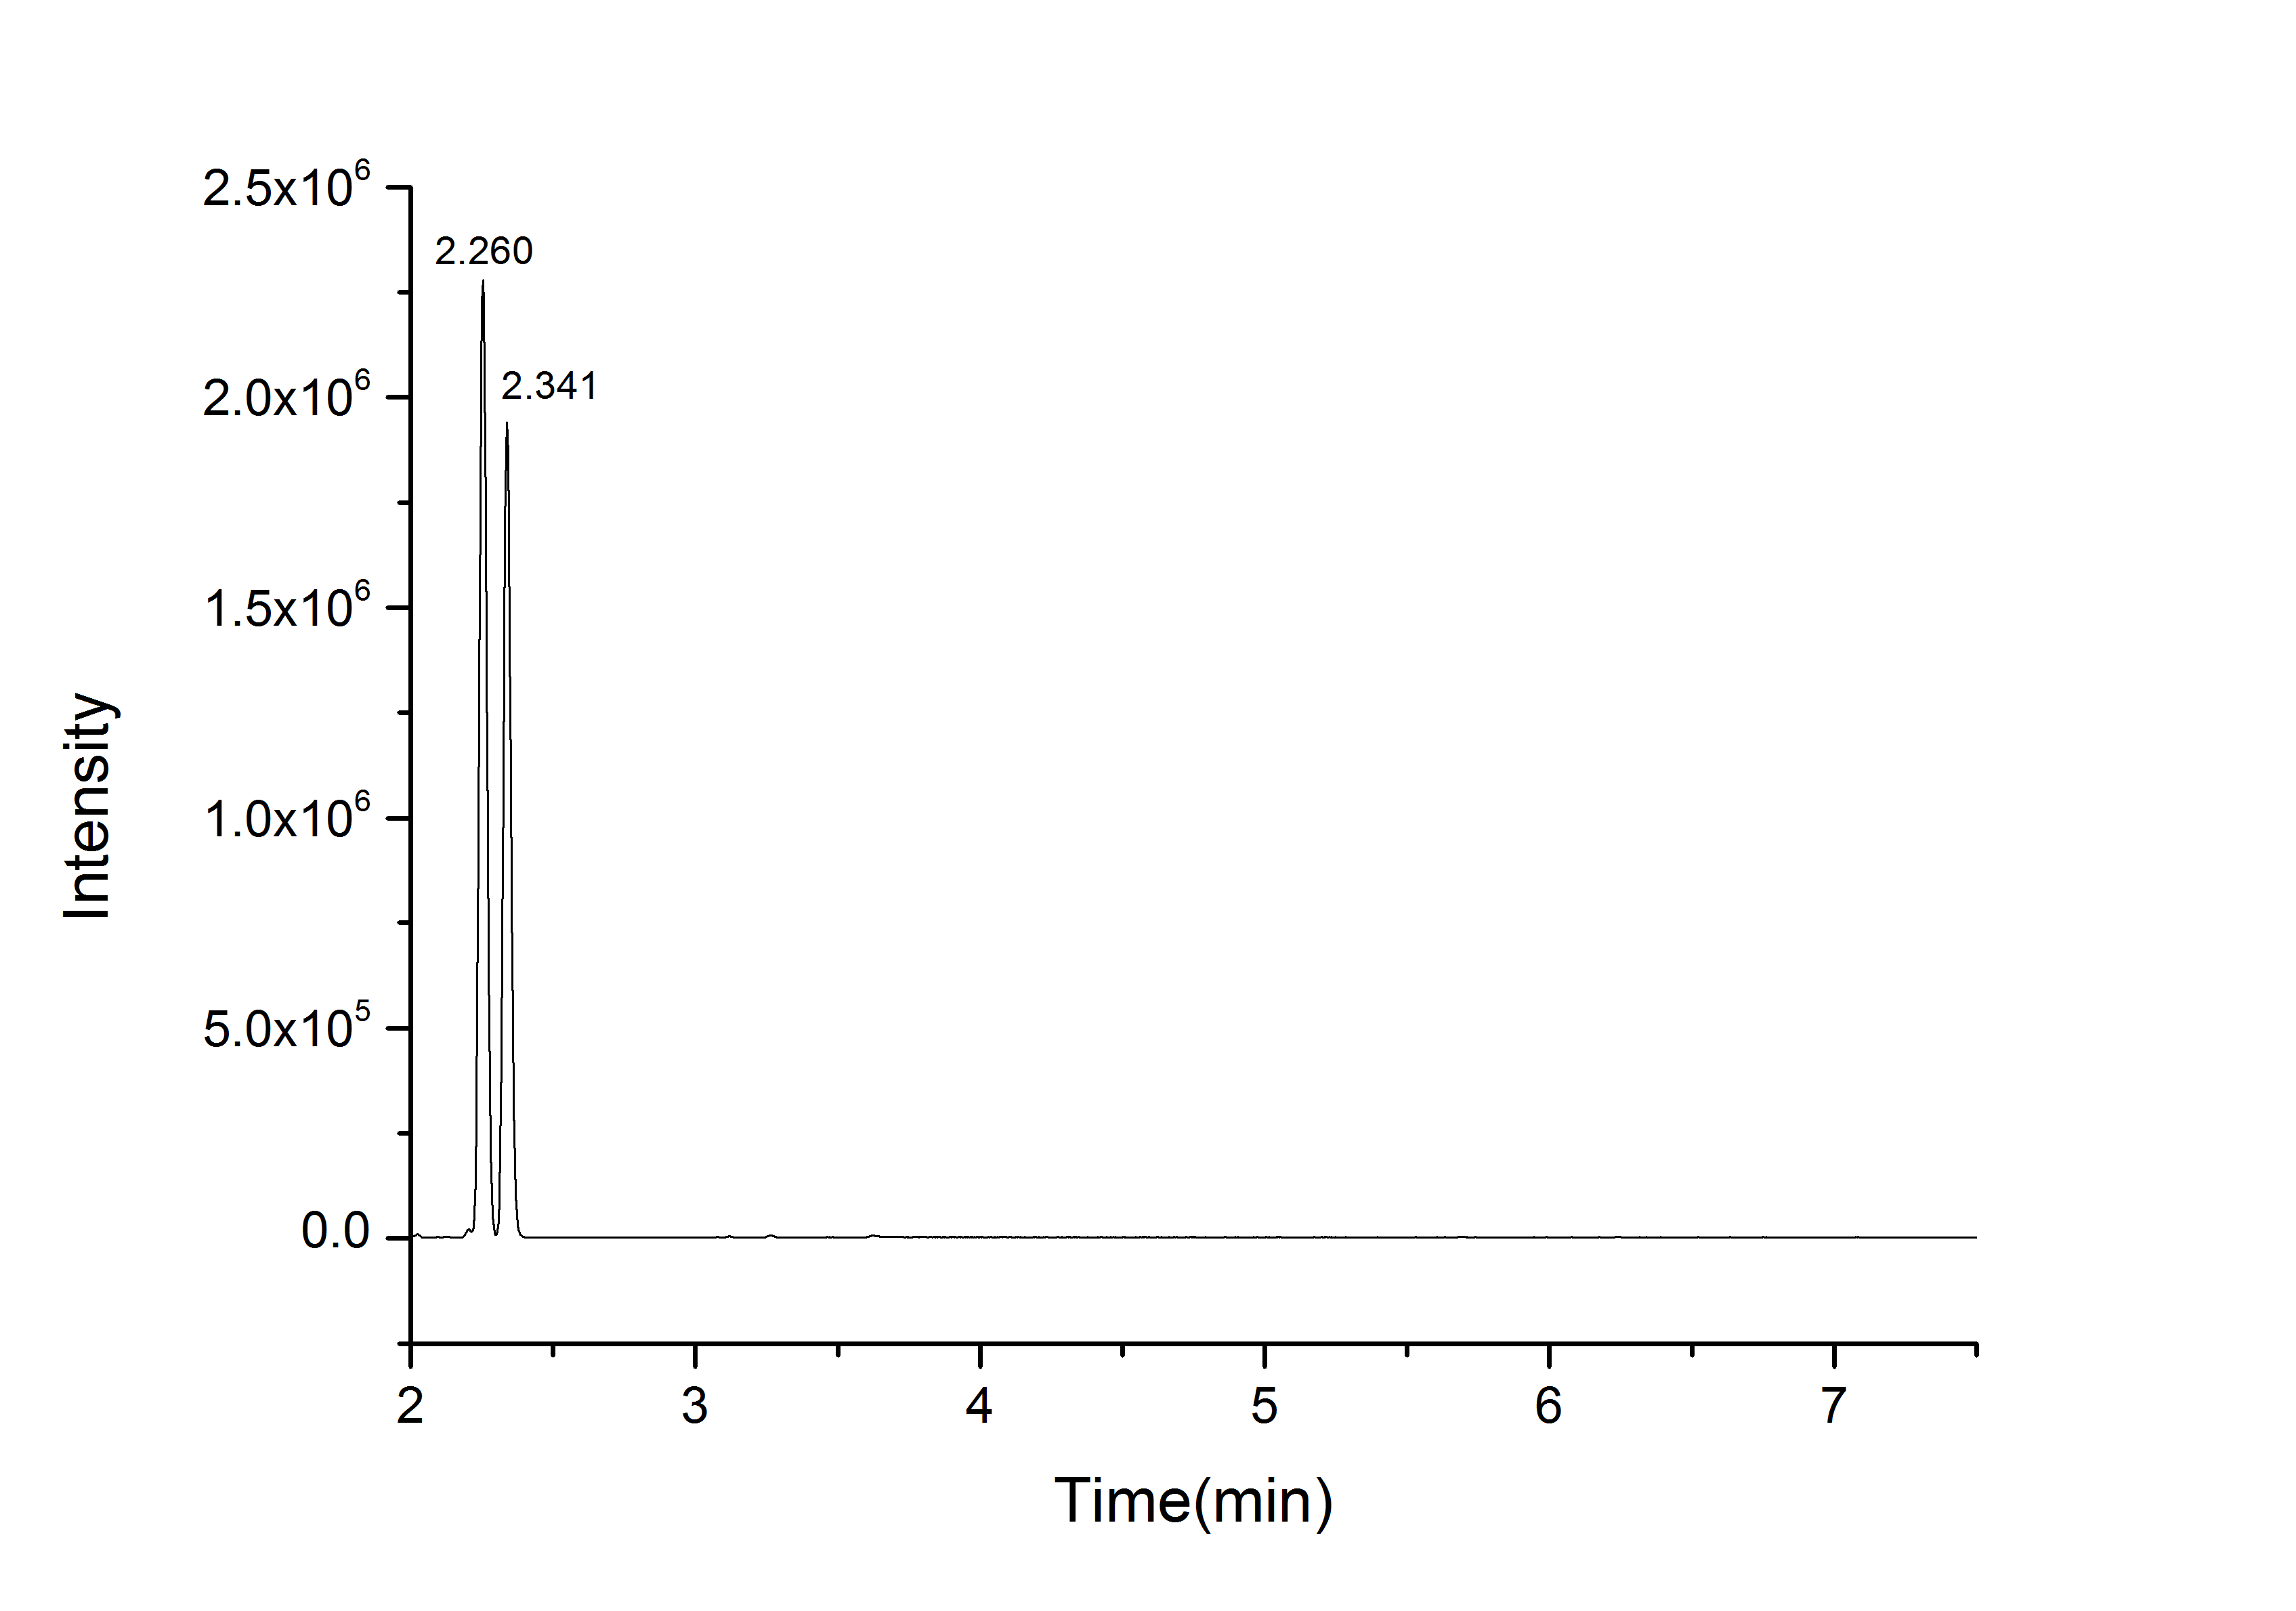


21. GC spectra of product 3c


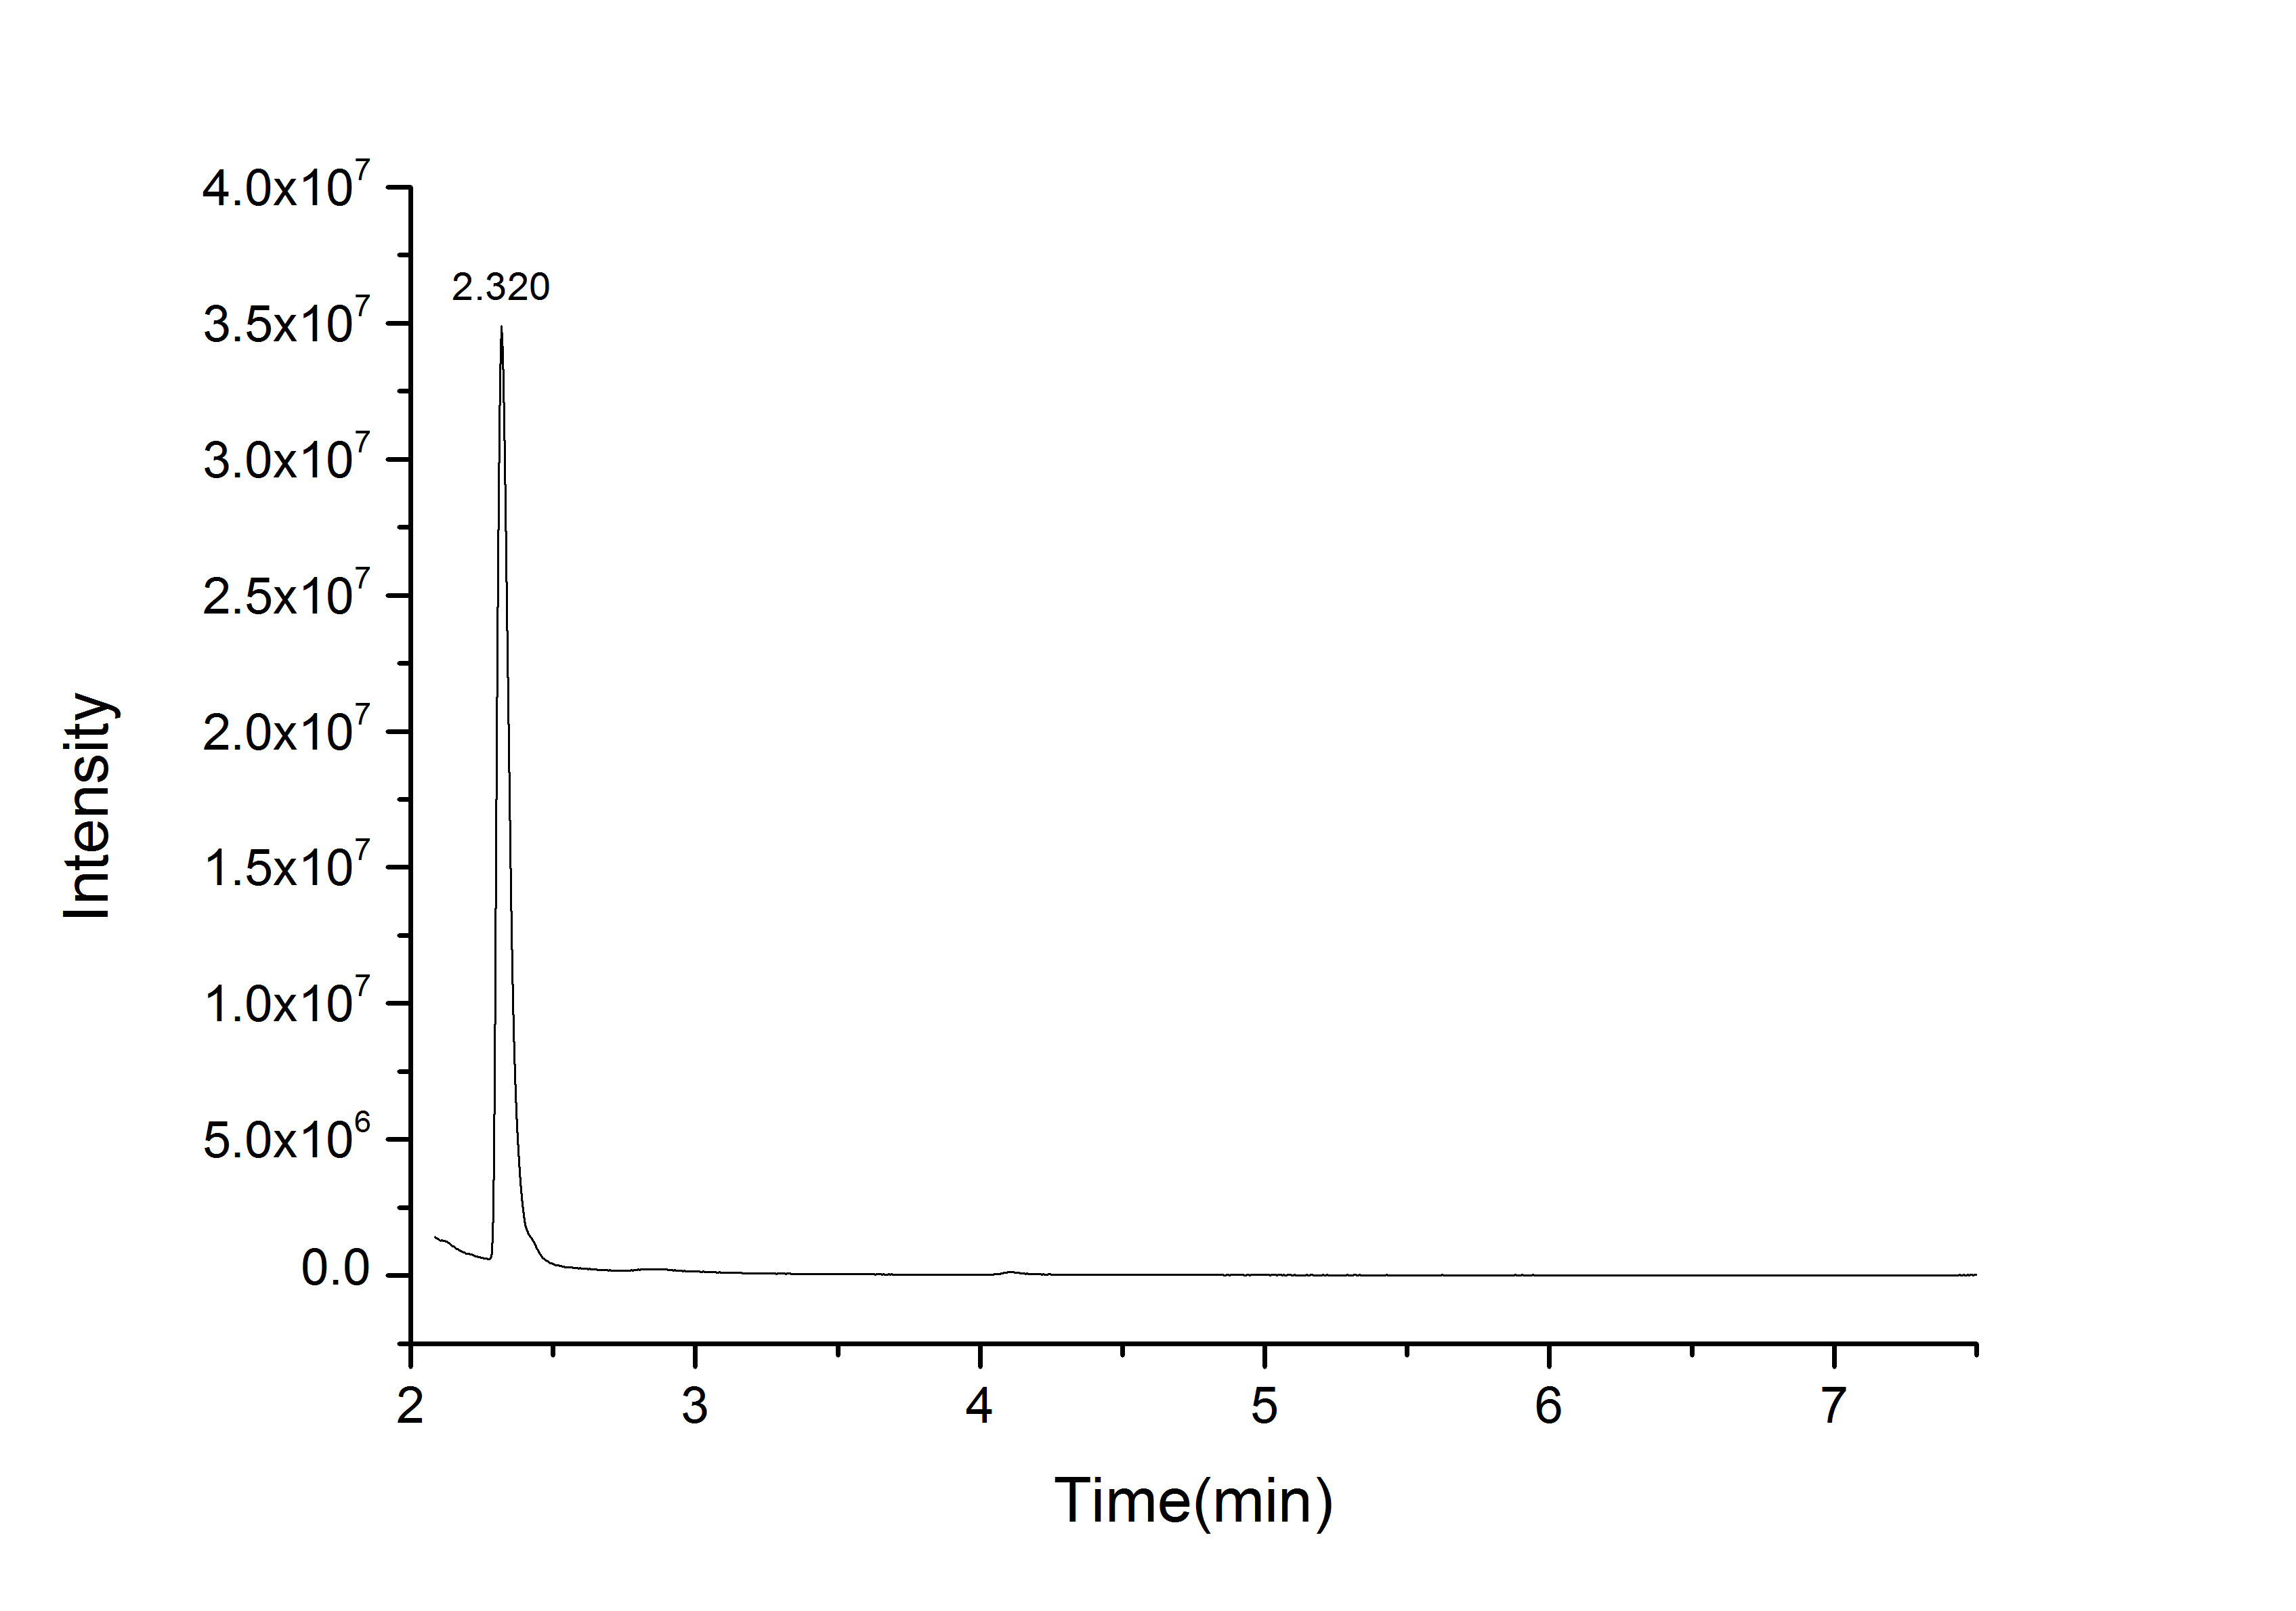


22. GC spectra of product 3d


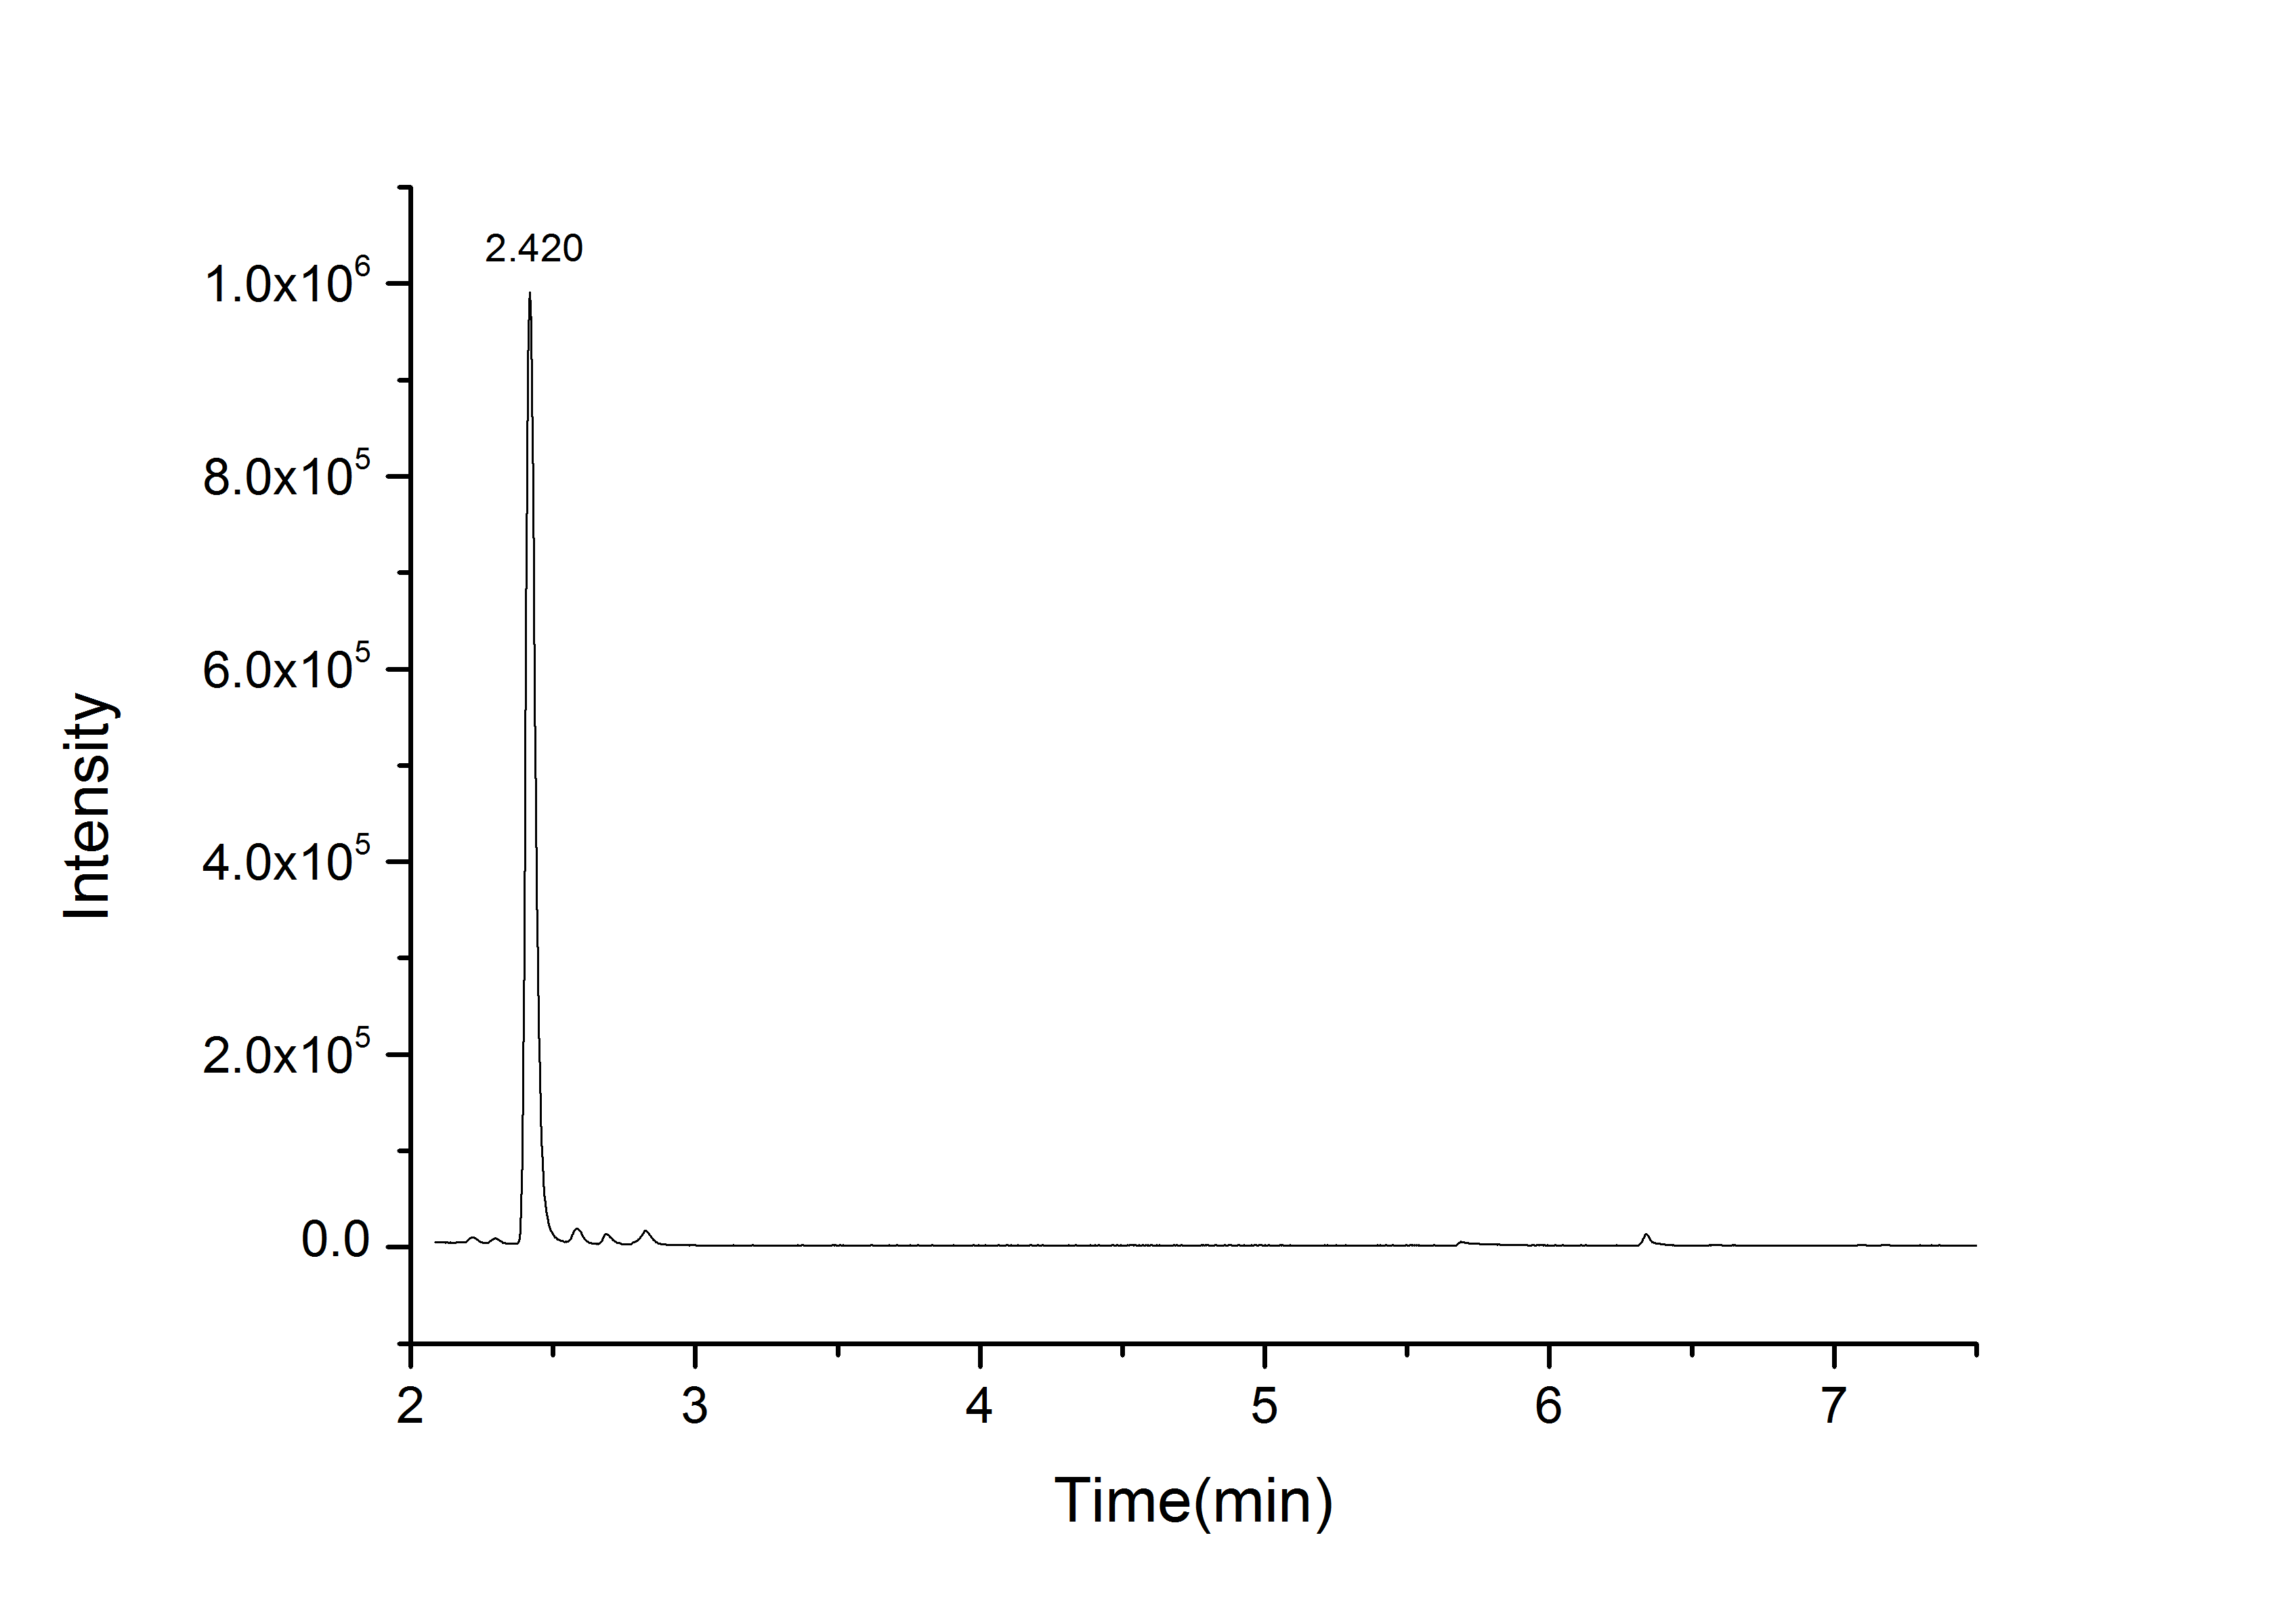


23. GC spectra of product 3e


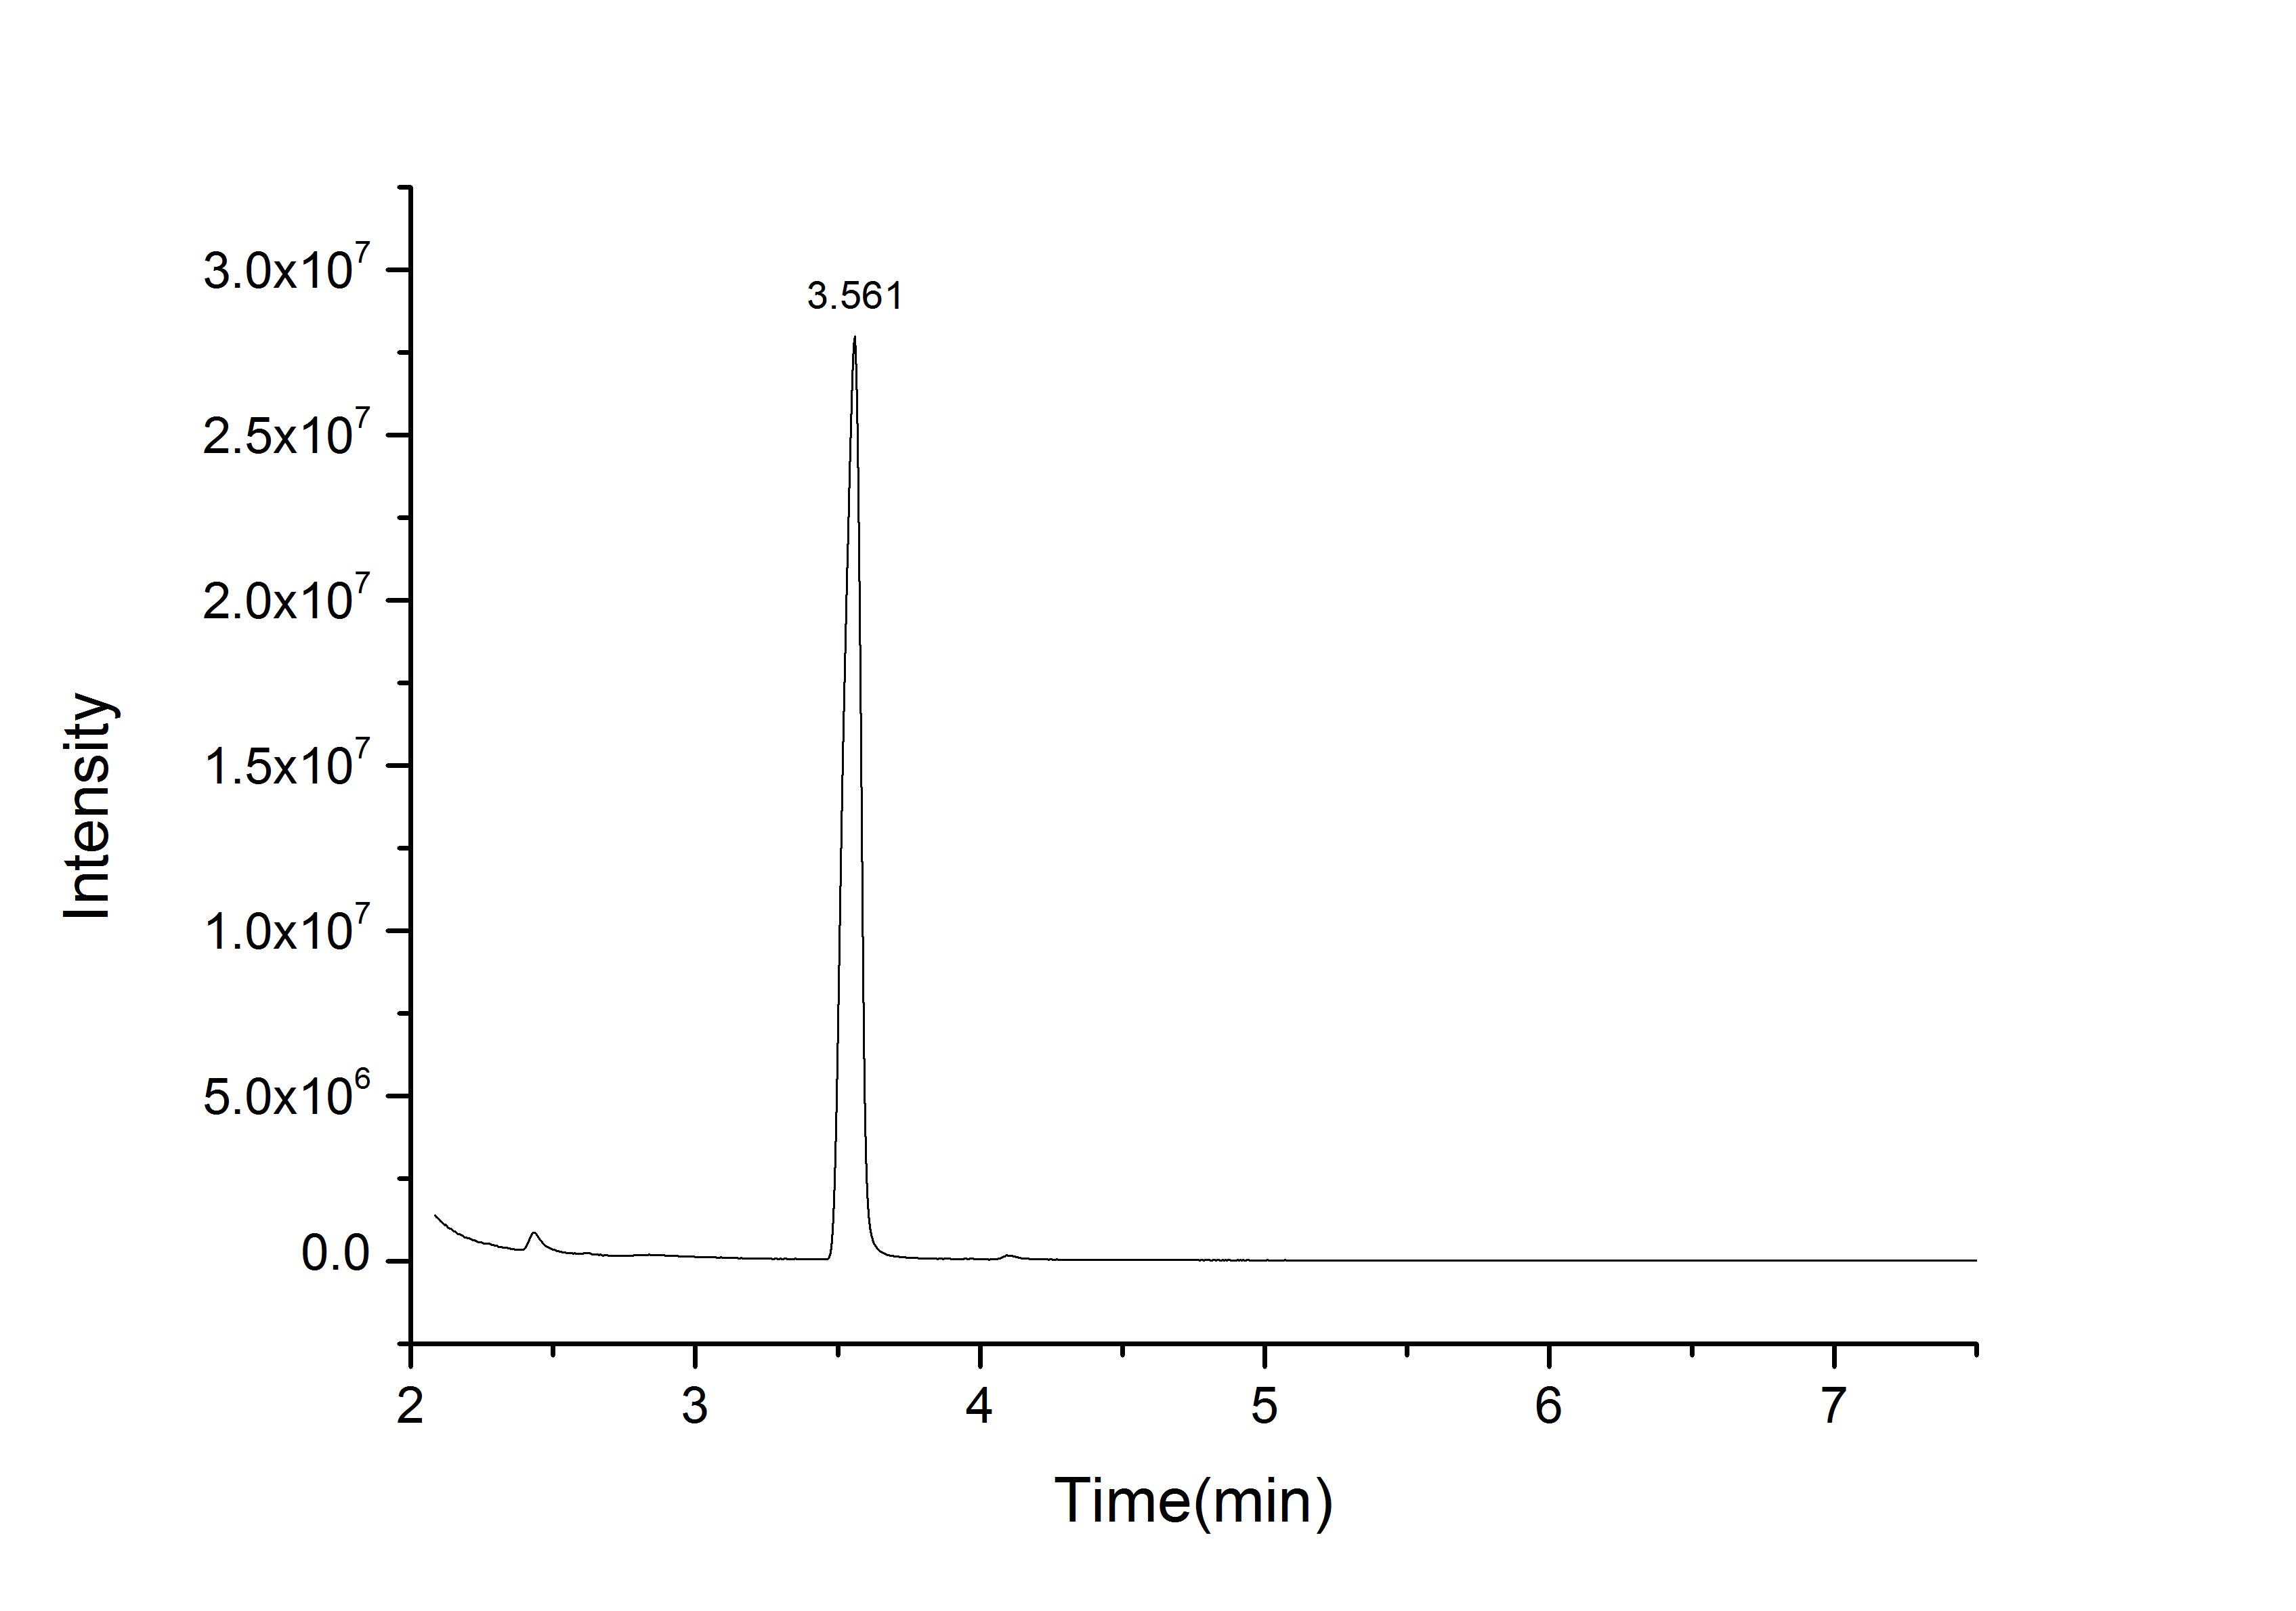


23. GC spectra of product 3g


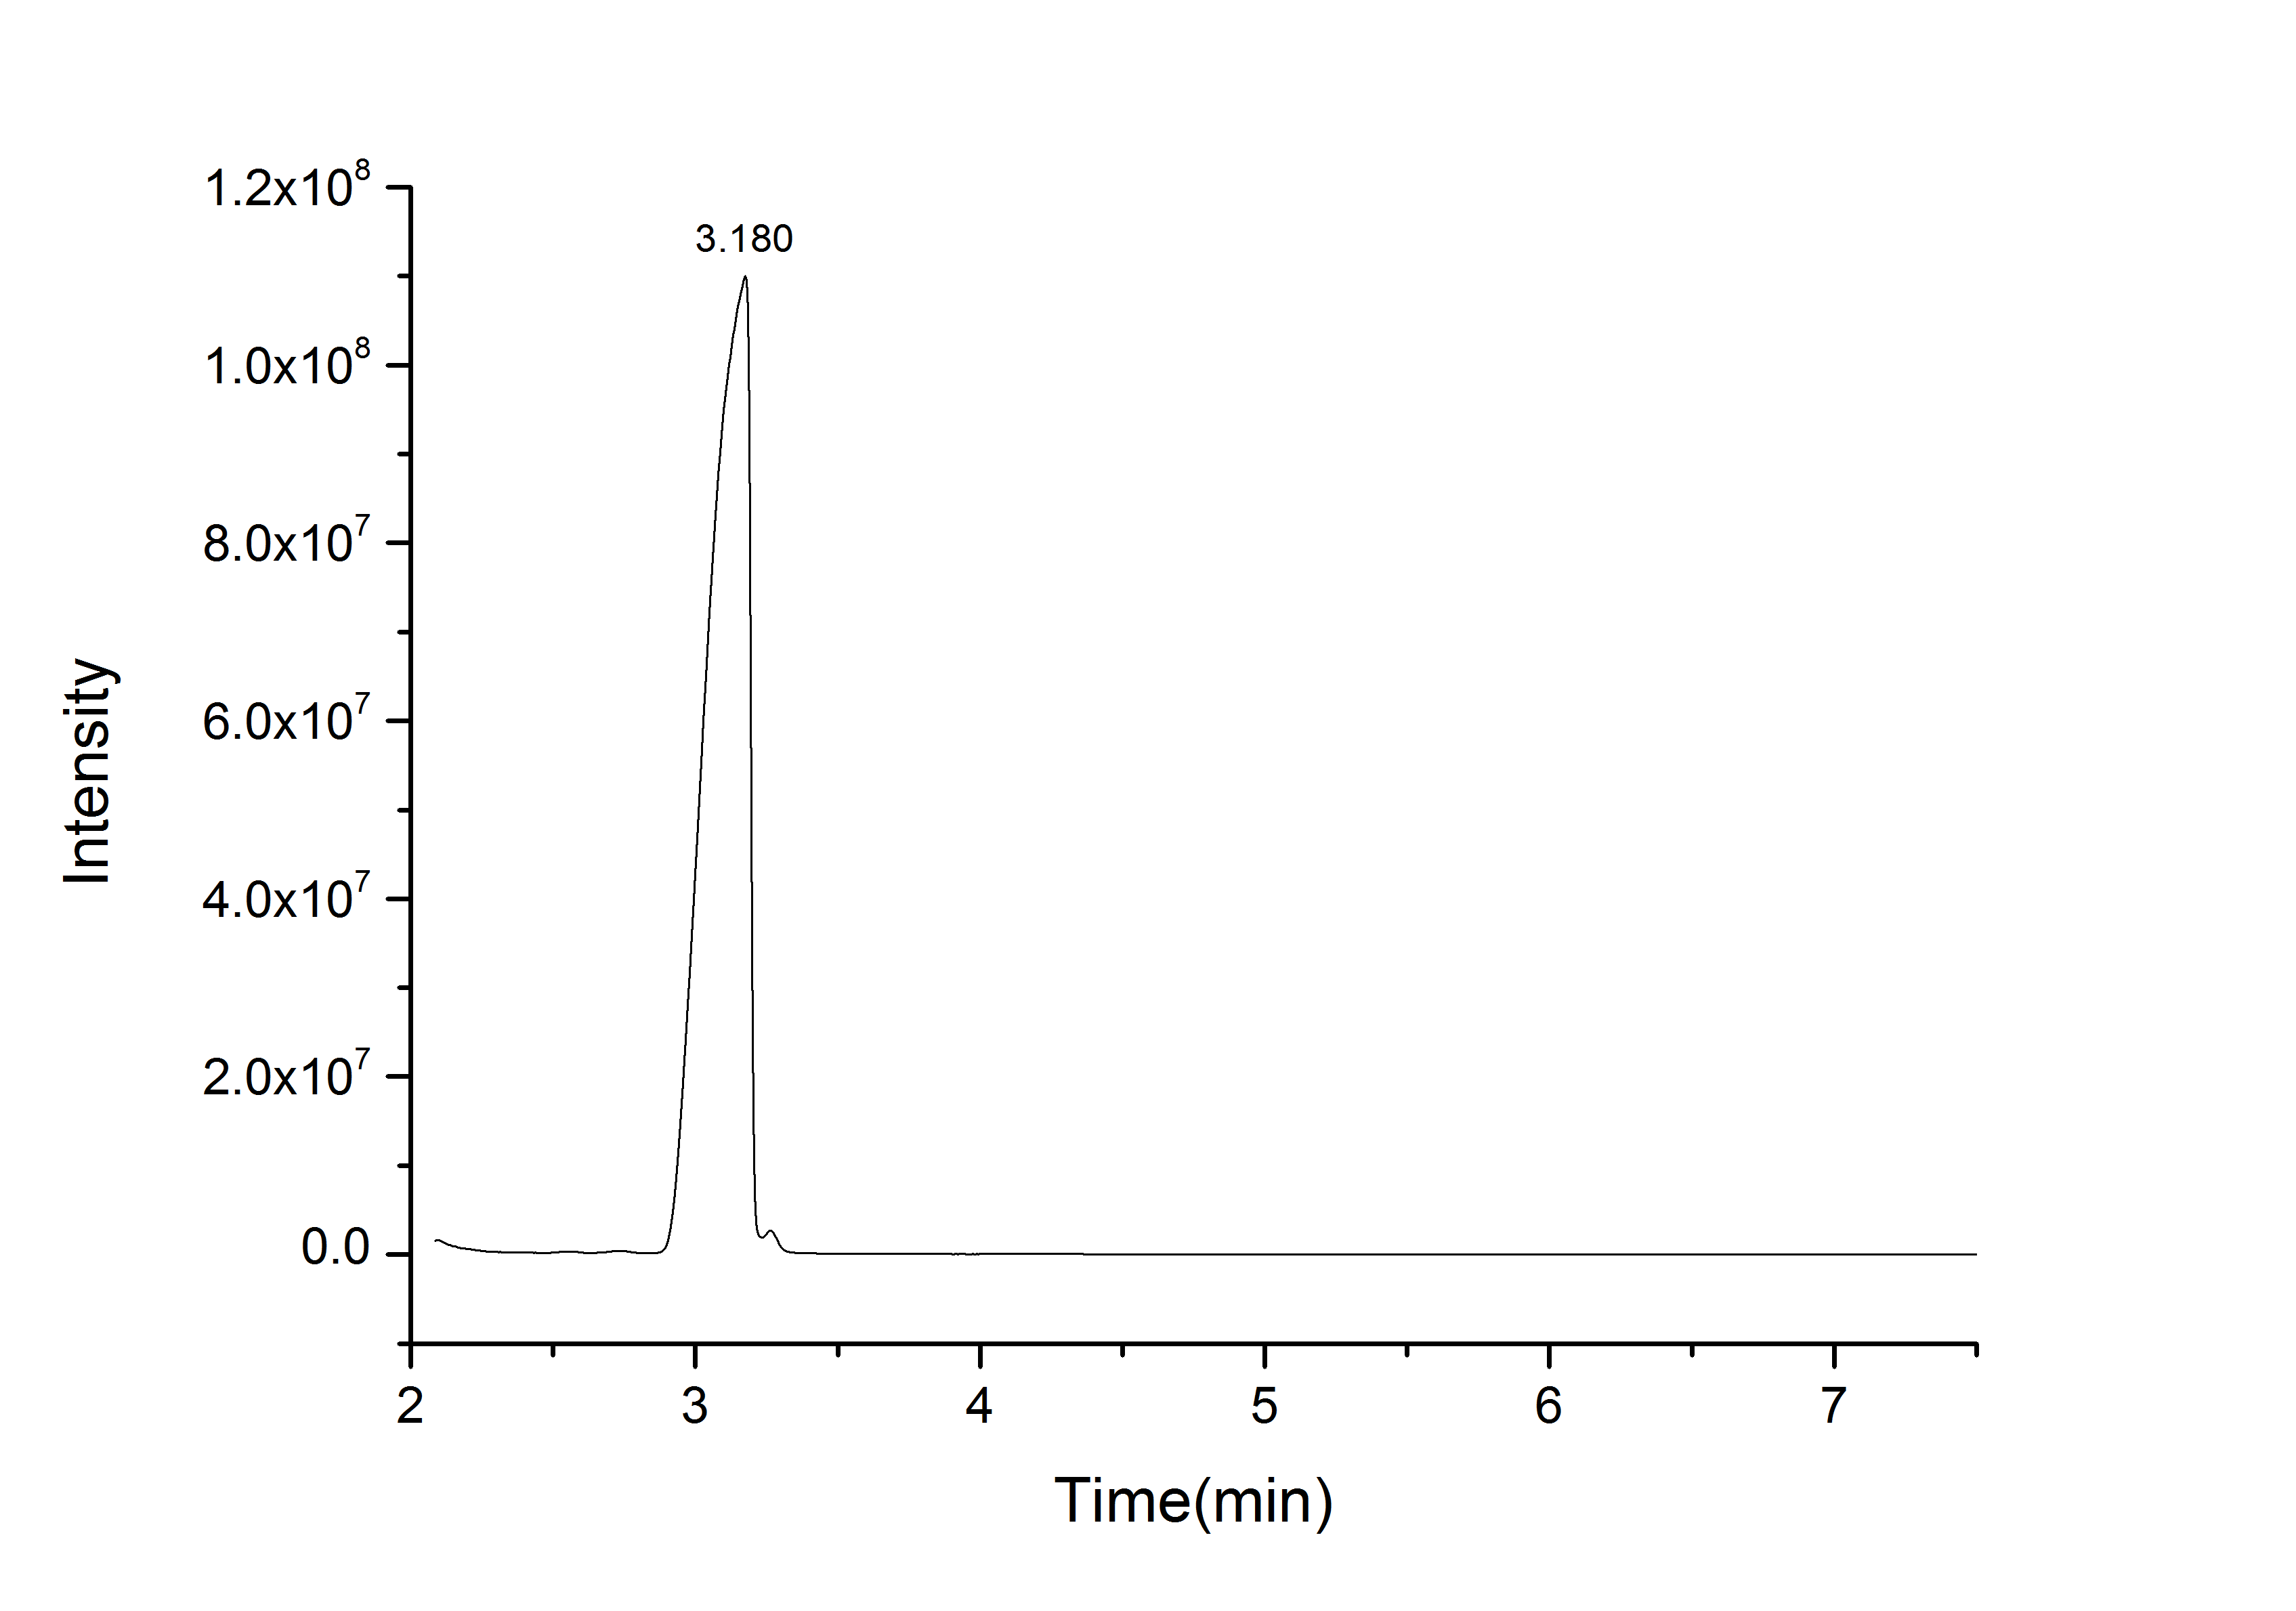

Supplement: 1H NMR, 13C NMR, MS and GC spectras of products 3a–3g [file rsos180740supp1.doc]
